# Supplementary material
Source: PubMed Central journal article supplement (PMC3320040)
Supplement: NIHMS340321-supplement-1_si_001.pdf [file NIHMS340321-supplement-1_si_001.pdf]

## Supporting Information

### A stereocontrolled synthesis of (+)-saxitoxin

Vasudev R. Bhonde and Ryan E. Looper\*

*Department of Chemistry, University of Utah,  
315 South 1400 East, Salt Lake City, Utah, 84112*

|                                                                                                  |      |
|--------------------------------------------------------------------------------------------------|------|
| <b>1. General Experimental Considerations</b> .....                                              | S-1  |
| <b>2 Experimental Procedures for intermediates 2-11 and model substrates 12&amp;13</b> .....     | S-2  |
| <b>3. <sup>1</sup>H NMR, <sup>13</sup>C NMR spectra of intermediates 2-11, 12 &amp; 13</b> ..... | S-8  |
| <b>4. Aligned <sup>1</sup>H NMR spectrum of model ene-guanidine 13 with intermediate 6</b> ..... | S-23 |
| <b>5. Comparison of spectral data of natural and synthetic β-saxitoxinol</b> .....               | S-25 |
| <b>6. Comparison of spectral data of natural and synthetic (+)-saxitoxin</b> .....               | S-26 |

---

#### **1. General Experimental Considerations:**

All reactions requiring anhydrous conditions were conducted in flame-dried glassware under a positive pressure of either nitrogen or argon. Commercially available reagents were used as received; otherwise, materials were purified according to *Purification of Laboratory Chemicals*.<sup>1</sup> Dichloromethane (CH<sub>2</sub>Cl<sub>2</sub>), acetonitrile (CH<sub>3</sub>CN) tetrahydrofuran (THF) diethyl ether (Et<sub>2</sub>O) were degassed with nitrogen and passed through a solvent purification system (Innovative Technologies Pure Solv). Triethylamine (Et<sub>3</sub>N) was distilled from CaH<sub>2</sub> immediately prior to use. Reactions were monitored by TLC and visualized by a dual short wave/long wave UV lamp and stained with aqueous solution of ceric ammonium molybdate. Flash chromatography was performed on Merck silica gel Kieselgel 60 (230-400 mesh) from EM Science with the indicated HPLC grade solvent.

Infrared spectra were obtained using Nicolet 380-FT IR spectrometer fitted with a Smart Orbit sample system. Optical rotations were obtained at ambient temperature on a Perkin Elmer Model 343 polarimeter (Na D line) using a microcell with a 1 decimeter path length. Mass spectra were determined on a Micromass Quattro II (ESI/APCI-TOF) for HRMS at the University of Utah Mass Spectrometry Facility. <sup>1</sup>H NMR and <sup>13</sup>C NMR spectra were recorded at 500 MHz and 125 MHz, respectively. Proton resonances were reported relative to the deuterated solvent peak: 7.27 ppm for CDCl<sub>3</sub>, 7.15 ppm for C<sub>6</sub>D<sub>6</sub>, 3.31 ppm (center line signal) for CD<sub>3</sub>OD and 4.80 ppm for D<sub>2</sub>O using the following format: chemical shift (δ) (multiplicity (s= singlet, brs= broad singlet, d= doublet, dd= double of doublet, ddd= double of doublet of doublet, dddd= double of doublet of doublet of doublet, t= triplet, dt= doublet of triplet of triplet, q= quartet, m= multiplet), coupling constant(s) *J* in Hz, integration).<sup>2</sup> Carbon resonances were reported as chemical shifts (δ) in parts per million, relative to the center line signal of the respective solvent peak: 77.23 ppm for CDCl<sub>3</sub>, 128.0 ppm for C<sub>6</sub>D<sub>6</sub> and 49.15 ppm for CD<sub>3</sub>OD and 164.2 ppm for TFA.

<sup>1</sup> *Purification of Laboratory Chemicals*. 2003, 5<sup>th</sup> Ed. Armarego, W. L. F.; Chai, C. L. L.

<sup>2</sup> Hoye, T.R.; Hansen, P.R.; Vyvyan, J.R. *J. Org. Chem.* **1994**; 59(15); 4096-4103.

## 2. Experimental Procedures:

**tert-butyl ((2*R*,3*R*)-3-(benzyl(hydroxy)amino)-7-(benzyloxy)-1-((*tert*-butyldiphenylsilyl)oxy)hept-4-yn-2-yl)carbamate (2).** A solution of homopropargyl benzyl ether (9.62 g, 60.1 mmol) in THF (450 mL) was cooled to -15 °C (MeOH/ice). To this solution was then added a 2M solution of <sup>1</sup>PrMgCl (30.6 mL, 61.3 mmol) in THF drop wise for 15 min and the solution was stirred at the same temperature for an additional 15 minutes. The flask was then cooled to -78 °C. A precooled solution of nitrone **1** (8.01 g, 15.5 mmol) in THF (30 mL) at -78 °C was added slowly to this solution via cannula. The addition was maintained so as the internal temperature did not exceed -78 °C. The contents of the flask were stirred at the same temperature for 4 h. The reaction mixture was then quenched with an ice-cold solution of aqueous saturated NH<sub>4</sub>Cl (100 mL) and then warmed to rt. The contents of the flask were diluted with EtOAc (500 mL) and partitioned in a separatory funnel. The organic layer was separated and the aqueous layer was extracted with EtOAc (2 × 200 mL). The combined organic layers were dried over Na<sub>2</sub>SO<sub>4</sub> and concentrated under reduced pressure to yield a colorless oil (dr: 9:1, based on crude <sup>1</sup>H NMR). Purification by flash column chromatography (5% EtOAc in Hexanes) gave *anti*-hydroxylamine **2** (6.88 g, 86%, based on recovery of nitrone **1**, 2.3 g) as a colorless oil.

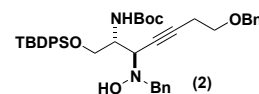

TLC  $R_f$  = 0.47 (8.5:1.5 Hexanes:EtOAc);  $[\alpha]_D^{20} = -38.4^\circ$  (c = 2.50, CHCl<sub>3</sub>); <sup>1</sup>H NMR (C<sub>6</sub>D<sub>6</sub>, 500 MHz): δ 7.75- 7.71 (m, 4H), 7.53 (d,  $J$  = 7.3 Hz, 2H), 7.26- 7.19 (m, 9H), 7.15- 7.10 (m, 4H), 7.08- 7.05 (m, 1H), 6.79 (brs, 1H), 4.86 (d,  $J$  = 10.2 Hz, 1H), 4.75- 4.68 (m, 1H), 4.60 (d,  $J$  = 13.6 Hz, 1H), 4.20 (s, 2H), 3.95 (d,  $J$  = 13.6 Hz, 1H), 3.92- 3.91 (m, 1H), 3.79 (dd,  $J$  = 10.2, 6.3 Hz, 1H), 3.72 (dd,  $J$  = 10.2, 7.8 Hz, 1H), 3.14 (ddd,  $J$  = 15.6, 15.6, 8.7 Hz, 2H), 2.10 (m, 2H), 1.37 (s, 9H), 1.10 (s, 9H) ppm; <sup>13</sup>C NMR (C<sub>6</sub>D<sub>6</sub>, 125 MHz) δ 157.3, 138.9, 138.6, 136.0, 136.0, 133.7, 133.6, 130.0, 130.0, 129.5, 128.5, 128.2, 128.1, 128.0, 127.7, 127.7, 127.0, 85.4, 79.5, 76.6, 72.8, 68.3, 64.0, 61.5, 61.4, 53.2, 28.3, 27.0, 20.2, 19.4 ppm; IR (neat) 3421, 2930, 2857, 2340, 2361, 2279, 1694, 1616, 1506, 1496, 1364, 1162, 1104, 812, 738, 698, 612 cm<sup>-1</sup>; HRMS (ESI) calcd for C<sub>42</sub>H<sub>52</sub>N<sub>2</sub>O<sub>5</sub>SiNa (M+Na): 715.3543, found: 715.3548.

### (2*R*,3*R*)-2-amino-3-(benzylamino)-7-(benzyloxy)hept-4-yn-1-ol bis-hydrochloride salt (3).

**tert-butyl ((2*R*,3*R*)-3-(benzylamino)-7-(benzyloxy)-1-((*tert*-butyldiphenylsilyl)oxy)hept-4-yn-2-yl)carbamate** To a slurry of zinc dust (2.43 g, 37.3 mmol) in AcOH (20 mL) was added Cu(OAc)<sub>2</sub> (135 mg, 746 μmol). The vessel was sealed and contents were stirred for 15 minutes at rt. A solution of hydroxylamine **2** (5.20 g, 7.50 mmol) in AcOH (20 mL) was then added to this slurry. After sealing the flask tightly, the flask were heated at 60 °C for 2 h. The flask was then cooled to rt and solid Na<sub>2</sub>EDTA (5.0 g) was added. This mixture was stirred vigorously for 5 minutes and the solution was basified (pH ≈ 10) carefully with 10% aqueous NaOH. The reaction mixture was diluted with EtOAc (200 mL) and stirred for 10 minutes. This mixture was then filtered through a pad of celite. The celite bed was washed with an additional portion of EtOAc (200 mL). The combined filtrates were then partitioned in a separatory funnel and organic layer was separated. The aqueous layer was extracted with EtOAc (2 × 100 mL). The combined organic layers were dried over Na<sub>2</sub>SO<sub>4</sub> and concentrated under reduced pressure to afford a light yellow oil which was purified by flash column chromatography (15% EtOAc in hexanes) to afford the required diamine (4.69 g, 92%) as a colorless oil.

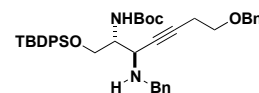

TLC  $R_f$  = 0.52 (8:2 Hexanes:EtOAc);  $[\alpha]_D^{20} = -17.2^\circ$  (c = 3.0, CHCl<sub>3</sub>); <sup>1</sup>H NMR (C<sub>6</sub>D<sub>6</sub>, 500 MHz): δ 7.73- 7.69 (m, 4H), 7.30 (d,  $J$  = 7.3 Hz, 2H), 7.22 (d,  $J$  = 7.3 Hz, 2H), 7.18- 7.16 (m, 5H), 7.14- 7.10 (m, 5H), 7.06- 7.03 (m, 2H), 5.37 (d,  $J$  = 9.2 Hz, 1H), 4.30- 4.24 (m, 1H), 4.26 (s, 2H), 4.03 (dd,  $J$  = 10.2, 9.7 Hz, 1H), 3.92 (d,  $J$  = 12.6 Hz, 1H), 3.81 (dd,  $J$  = 9.7, 5.8 Hz, 1H), 3.80- 3.76 (m, 1H), 3.72 (d,  $J$  = 13.1 Hz, 1H), 3.26 (ddd,  $J$  = 9.2, 6.3, 2.4 Hz, 2H), 2.25 (dddd,  $J$  = 6.8, 6.8, 1.4, 1.4 Hz, 2H), 1.42 (s, 9H), 1.03 (s, 9H) ppm; <sup>13</sup>C NMR (C<sub>6</sub>D<sub>6</sub>, 125 MHz) δ 155.6, 140.3, 138.7, 136.0, 136.0, 135.9, 135.9, 133.6, 133.6, 129.9, 128.7, 128.5, 128.5, 128.0, 128.0, 127.7, 127.1, 82.9, 79.9, 78.8, 72.9, 68.7, 64.3, 54.9, 51.6, 51.2, 28.4, 26.9, 20.4, 19.3 ppm; IR (neat) 2929, 2857, 2279, 1713, 1494, 1472, 1427, 1390, 1364, 1329, 1247, 1165, 1104, 1027, 812, 737, 698, 613 cm<sup>-1</sup>; HRMS (ESI) calcd for C<sub>42</sub>H<sub>52</sub>N<sub>2</sub>O<sub>4</sub>SiNa (M+Na): 699.3594, found: 699.3594.

In a 50 mL sealed vessel, the diamine (0.74 g, 1.09 mmol) was dissolved in 4N HCl in MeOH (15 mL) and heated at 40 °C for 12 h. After cooling the flask to rt, decolorizing charcoal was added to the flask and the contents were heated in an open flask at 40 °C for 15 min. The contents of the flask were then filtered through a small pad of celite. The celite bed was washed with an additional 20 mL of MeOH. The combined filtrates were then evaporated under

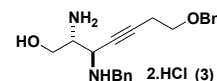

reduced pressure to yield an off-white residue. This material was washed with ether (3 × 15 mL) to afford the diamine *bis*-hydrochloride salt **3** (398 mg, 89%) as an amorphous off white solid.

TLC  $R_f$  = 0.32 (9:1 CH<sub>2</sub>Cl<sub>2</sub>:MeOH);  $[\alpha]_D^{20}$  = -29.1° (c = 1.65, MeOH); <sup>1</sup>H NMR (CD<sub>3</sub>OD, 500 MHz): δ 7.54-7.52 (m, 2H), 7.46- 7.41 (m, 3H), 7.38- 7.35 (m, 2H), 7.33- 7.29 (m, 2H), 7.28- 7.25 (m, 1H), 4.60 (s, 2H), 4.51-4.50 (bs, 1H), 4.49 (d,  $J$  = 13.1 Hz, 1H), 4.30 (d,  $J$  = 13.1 Hz, 1H), 3.87 (dd,  $J$  = 11.7, 5.37 Hz, 1H), 3.82 (dd,  $J$  = 11.7, 5.3 Hz, 1H), 3.75 (t,  $J$  = 6.3 Hz, 2H), 3.74 (d,  $J$  = 5.8 Hz, 1H), 2.75 (dt,  $J$  = 6.3, 2.4 Hz, 2H) ppm; <sup>13</sup>C NMR (CD<sub>3</sub>OD, 125 MHz) δ 139.2, 131.6, 131.3, 130.8, 130.2, 129.5, 129.0, 128.9, 94.7, 74.1, 69.8, 68.7, 60.1, 54.2, 51.1, 50.8, 21.0 ppm; IR (neat) 3330, 2856, 2361, 2340, 1646, 1635, 1616, 1575, 1521, 1456, 1362, 1210, 1156, 1095, 1064, 1028, 746, 696, 607 cm<sup>-1</sup>; HRMS (ESI) calcd for C<sub>21</sub>H<sub>27</sub>N<sub>2</sub>O<sub>2</sub> (M+H): 339.2073, found: 339.2068.

**(2*R*,3*R*)-2-amino-3-(benzylamino)-7-(benzyloxy)hept-4-yn-1-yl carbamate (4).**

To a solution of diamine *bis*-hydrochloride **3** (1.10 g, 2.68 mmol) in CH<sub>2</sub>Cl<sub>2</sub> (3 mL) was added KOCN (1.30 g, 16.0 mmol) at 0 °C. To this solution was then added Me<sub>3</sub>SO<sub>3</sub>H (10 mL) dropwise over a period of 10 min. The reaction mixture was stirred at the same temperature for 2 h. The contents of the flask were added carefully to crushed ice (~50 g) and basified (pH ≈ 10) carefully with aqueous saturated NaHCO<sub>3</sub> solution. This solution was then transferred to a separatory funnel and extracted with CH<sub>2</sub>Cl<sub>2</sub> (5 × 50 mL). The combined organic layers were dried over Na<sub>2</sub>SO<sub>4</sub> and concentrated under reduced pressure. Purification by flash column chromatography (4% MeOH in CH<sub>2</sub>Cl<sub>2</sub>) afforded the diaminocarbamate **4** (794 mg, 78%) as a colorless oil.

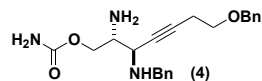

TLC  $R_f$  = 0.48 (8:1:1 EtOAc:MeOH:H<sub>2</sub>O);  $[\alpha]_D^{20}$  = +0.34° (c = 0.74, CHCl<sub>3</sub>); <sup>1</sup>H NMR (C<sub>6</sub>D<sub>6</sub>, 400 MHz) δ 7.36 (d,  $J$  = 7.3 Hz, 2H), 7.27 (d,  $J$  = 7.3 Hz, 2H), 7.19- 7.15 (m, 4H), 7.11- 7.06 (m, 2H), 4.71- 4.57 (m, 2H), 4.29 (s, 2H), 4.15 (m, 2H), 3.98 (d,  $J$  = 13.1 Hz, 1H), 3.79 (d,  $J$  = 12.6 Hz, 1H), 3.45 (m, 1H), 3.33 (td,  $J$  = 6.8, 0.9 Hz, 2H), 3.05 (dt,  $J$  = 8.7, 4.3, 2.4 Hz, 1H), 2.31 (tt,  $J$  = 6.8, 1.9 Hz, 2H), 1.54 (brs, 3H) ppm; <sup>13</sup>C NMR (C<sub>6</sub>D<sub>6</sub>, 125 MHz) δ 156.6, 140.7, 138.8, 128.7, 128.5, 128.5, 128.2, 127.7, 127.1, 83.2, 79.4, 72.9, 68.8, 67.6, 54.2, 52.5, 51.6, 20.4 ppm. IR (neat) 3353, 3061, 3028, 2860, 2360, 2340, 1716, 1635, 1616, 1454, 1403, 1332, 1205, 1066, 1028, 911, 847, 781, 736, 697 cm<sup>-1</sup>; HRMS (ESI) calcd for C<sub>22</sub>H<sub>28</sub>N<sub>3</sub>O<sub>3</sub> (M+H): 382.2131, found: 382.2133.

**Bis-propargyl guanidine (5).** To a solution of diaminocarbamate **4** (315 mg, 0.82 mmol) in CH<sub>2</sub>Cl<sub>2</sub> (16 mL) was added *N,N'*-Di-Boc-*S*-methylisothiourea (479 mg, 1.65 mmol), NEt<sub>3</sub> (241 μL, 1.72 mmol) and HgO (371 mg, 1.72 mmol) at rt. The reaction mixture was stirred at rt for 8 h. Contents of the flask were diluted with CH<sub>2</sub>Cl<sub>2</sub> (5 mL) and filtered through a pad of celite. The celite bed was washed with an additional 15 mL of (CH<sub>2</sub>Cl<sub>2</sub>). The combined filtrates were concentrated under reduced pressure. Purification by flash column chromatography (30% EtOAc in hexanes) gave the *bis*-guanidine **5** (586 mg, 83%) as a colorless foam.

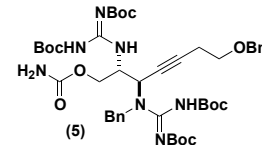

TLC  $R_f$  = 0.33 (6:4 Hexanes:EtOAc);  $[\alpha]_D^{20}$  = -7.8° (c = 1.35, CHCl<sub>3</sub>); <sup>1</sup>H NMR (C<sub>6</sub>D<sub>6</sub>, 500 MHz, 55 °C): 12.03 (s, 1H), 9.7 (s, 1H), 8.82 (d,  $J$  = 8.3 Hz, 1H), 7.27- 7.23 (m, 2H), 7.19- 7.15 (m, 4H), 7.07-7.02 (m, 3H), 6.94-6.92 (m, 1H) 6.39 (brs, 1H), 5.03- 5.02 (m, 1H), 4.99 (d,  $J$  = 15.6 Hz, 1H), 4.90 (d,  $J$  = 16.5 Hz, 1H), 4.47 (dd,  $J$  = 11.2, 4.3 Hz, 1H), 4.42 (dd,  $J$  = 11.2, 5.3 Hz, 1H), 4.25 (brs, 2H), 4.19 (s, 2H), 3.20 (brs, 2H), 2.13 (brs, 2H), 1.44 (s, 9H), 1.40 (s, 9H), 1.27 (s, 9H), 1.20 (s, 9H) ppm; <sup>13</sup>C NMR (C<sub>6</sub>D<sub>6</sub>, 125 MHz, mixture of rotamers) 164.5, 163.1, 157.9, 156.9, 155.5, 153.6, 151.2, 139.2, 139.0, 128.9, 128.4, 128.6, 128.0, 127.4, 127.3, 82.7, 81.9, 79.3, 79.0, 76.3, 73.1, 68.6, 63.9, 54.4, 52.0, 50.6, 31.7, 28.7, 28.7, 28.3, 28.1, 28.1, 27.7, 20.6 ppm; IR (neat) 3307, 2977, 1718, 1683, 1599, 1540, 1455, 1417, 1392, 1365, 1313, 1250, 1229, 1140, 1102, 1055, 1027, 987, 807, 776, 732, 696 cm<sup>-1</sup>; HRMS (ESI) calcd for C<sub>44</sub>H<sub>63</sub>N<sub>7</sub>O<sub>11</sub>Na (M+Na): 888.4483, found: 888.4479.

**(*S*,*SZ*)-*tert*-butyl 4-((*R*)-1-amino-6-((*tert*-butoxycarbonyl)amino)-10,10-dimethyl-1,8-dioxo-2,9-dioxo-5,7-diazaundec-6-en-4-yl)-3-benzyl-5-(3-(benzyloxy)propylidene)-2-((*tert*-butoxycarbonyl)imino)imidazolidine-1-carboxylate (6).**

To a stirred solution of *bis*-guanidine **5** (1.82 g 2.10 mmol), in CH<sub>2</sub>Cl<sub>2</sub> (25 mL) was added AgOAc (34 mg, 21 μmol) at rt and the reaction was stirred for 9 h. The contents of the flask were filtered through a pad of celite and the celite bed was washed with an additional 10 mL of CH<sub>2</sub>Cl<sub>2</sub>. The combined filtrates were concentrated to give the ene-guanidine **6** (1.79 g, 98%) as a colorless foam which was used in the next step without any further purification.

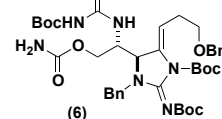

TLC  $R_f$  = 0.39 (1:1 Hexanes:EtOAc);  $[\alpha]_D^{20}$  = +9.9° (c = 1.40, CHCl<sub>3</sub>); <sup>1</sup>H NMR (C<sub>6</sub>D<sub>6</sub>, 500 MHz, 35 °C): δ 12.09, (s, 1H), 8.82 (d,  $J$  = 7.8 Hz, 1H), 7.31 (d,  $J$  = 7.3 Hz, 2H), 7.21- 7.18 (m, 4H), 7.13-7.08 (m, 1H), 7.05-7.01 (m, 2H), 6.98- 6.95 (m, 1H), 5.38 (d,  $J$  = 15.6 Hz, 1H), 4.95 (dd,  $J$  = 8.7, 4.8 Hz, 1H), 4.79- 4.50 (bs,

1H), 4.50 (ddd,  $J = 7.8, 7.8, 3.9$  Hz, 1H), 4.35- 4.28 (m, 3H), 4.25 (d,  $J = 3.9$  Hz, 1H), 4.04 (bs, 1H), 3.92 (dd,  $J = 12.2, 4.3$  Hz, 1H), 3.35 (s, 2H), 3.26 (t,  $J = 6.3$  Hz, 2H), 2.53 (dddd,  $J = 15.2, 15.2, 6.8, 6.3$  Hz, 1H), 2.41 (dddd,  $J = 15.1, 11.7, 6.3, 6.3$  Hz, 1H), 1.59 (s, 9H), 1.44 (s, 9H), 1.43 (s, 9H), 1.21 (s, 9H) ppm;  $^{13}\text{C}$  NMR ( $\text{C}_6\text{D}_6$ , 35 °C, 125 MHz)  $\delta$  164.0, 159.1, 157.0, 156.1, 153.3, 153.2, 149.6, 139.3, 136.5, 131.9, 128.9, 128.5, 128.2, 127.8, 127.5, 116.7, 83.7, 83.0, 78.9, 78.3, 72.7, 69.0, 63.2, 59.1, 53.1, 51.6, 48.9, 29.7, 28.5, 28.3, 28.0, 27.7 ppm; IR (neat) 2978, 2361, 1339, 2279, 1748, 1733, 1684, 1615, 1558, 1540, 1521, 1496, 1366, 1250, 1147, 1116, 1054, 1028, 811, 699  $\text{cm}^{-1}$ ; HRMS (ESI) calcd for  $\text{C}_{44}\text{H}_{63}\text{N}_7\text{O}_{11}\text{Na}$  (M+Na): 888.4483, found: 888.4480.

**(4*R*,5*S*,6*S*)-di-*tert*-butyl 7-benzyl-4-((*R*)-3-(benzyloxy)-1-iodopropyl)-2,8-bis((*tert*-butoxycarbonyl)imino)-6-((carbamoyloxy)methyl)tetrahydro-1*H*-purine-3,9(2*H*,4*H*)-dicarboxylate (8).**

To a stirred solution of *ene*-guanidine **6** (0.93 g, 1.07 mmol) in  $\text{Et}_2\text{O}$  (15 mL) at 0 °C, was added silver acetate (214 mg, 1.28 mmol) and crushed iodine (327 mg, 1.28 mmol) and the reaction was warmed to rt and stirred for 18 h. The reaction mixture was then diluted with  $\text{EtOAc}$  (100 mL) and filtered through a small pad of celite. The combined filtrates were transferred to a separatory funnel and washed with 2N  $\text{Na}_2\text{S}_2\text{O}_3$  (100 mL). The organic layer was separated and the aqueous layer was extracted with additional portions of  $\text{EtOAc}$  (3  $\times$  100 mL). The combined organic layers were dried over  $\text{Na}_2\text{SO}_4$  and concentrated under reduced pressure. Purification by flash column chromatography (30%  $\text{EtOAc}$  in hexanes) afforded the bicyclic guanidine **8** (0.87 g, 82%) as a colorless foam.

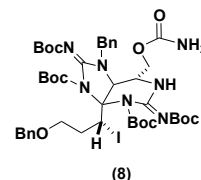

TLC  $R_f = 0.38$  (9.5:0.5  $\text{CH}_2\text{Cl}_2$ :MeOH);  $[\alpha]_D^{20} = +88.7^\circ$  ( $c = 1.18$ ,  $\text{CHCl}_3$ );  $^1\text{H}$  NMR ( $\text{C}_6\text{D}_6$ , 500 MHz):  $\delta$  9.47 (d,  $J = 5.3$  Hz, 1H), 7.49 (d,  $J = 7.3$  Hz, 2H), 7.24 (d,  $J = 15.1$  Hz, 2H), 7.23 (d,  $J = 15.1$  Hz, 2H), 7.16- 7.11 (m, 1H), 6.99- 6.91 (m, 3H), 6.48 (d,  $J = 12.6$  Hz, 1H), 4.77 (d,  $J = 14.6$  Hz, 1H), 4.55 (d,  $J = 12.2$  Hz, 1H), 4.51- 4.46 (m, 1H), 4.47 (d,  $J = 12.6$  Hz, 1H), 4.26 (t,  $J = 8.78$  Hz, 1H), 4.2 (s, 1H), 3.92 (brs, 2H), 3.82 (d,  $J = 14.6$  Hz, 1H), 3.54 (ddd,  $J = 9.7, 9.7, 2.9$  Hz, 1H), 3.46 (m, 1H), 2.60 (m, 1H), 1.69 (s, 9H), 1.61 (s, 9H), 1.49 (s, 9H), 1.42 (s, 9H) ppm;  $^{13}\text{C}$  NMR ( $\text{C}_6\text{D}_6$ , 125 MHz, 35 °C)  $\delta$  163.9, 159.8, 159.8, 155.6, 151.4, 150.7, 148.9, 139.2, 135.4, 129.6, 128.9, 128.5, 128.2, 127.9, 127.5, 85.2, 82.6, 82.3, 78.6, 78.3, 71.7, 67.6, 64.8, 62.4, 51.0, 46.5, 39.1, 32.5, 28.7, 28.2, 28.1, 27.6 ppm; IR (neat) 3305, 2976, 2931, 2360, 1751, 1653, 1616, 1453, 1393, 1367, 1322, 1276, 1254, 1157, 1139, 1101, 845, 736, 705  $\text{cm}^{-1}$ ; HRMS (ESI) calcd for  $\text{C}_{44}\text{H}_{63}\text{N}_7\text{O}_{11}\text{I}$  (M+H): 992.3630, found: 992.3631.

**(3*aR*,4*R*,10*S*,10*aS*)-*tert*-butyl 1-benzyl-4-(2-(benzyloxy)ethyl)-2,8-bis((*tert*-butoxycarbonyl)imino)-10-((carbamoyloxy)methyl)-6-oxohexahydro-1*H*-oxazolo[3,4-*c*]purine-3(2*H*)-carboxylate (9).**

To a solution of iodide **8** (0.72 g, 0.72 mmol) in  $\text{CH}_3\text{CN}$  (8.0 mL) was added  $\text{AgOAc}$  (0.36 g, 2.15 mmol) and  $\text{AcOH}$  (0.50 mL) at rt and the reaction mixture was heated at 60 °C for 8 h. The reaction mixture was cooled to rt and diluted with  $\text{EtOAc}$  (10 mL). The inorganic salts were filtered through a pad of celite and the celite bed was washed with an additional 10 mL of  $\text{EtOAc}$ . The combined filtrates were concentrated under reduced pressure. Purification by flash column chromatography (50%  $\text{EtOAc}$  in hexanes) gave cyclic carbamate **9** (0.45 g, 77%) as a colorless oil.

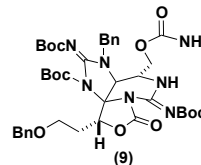

TLC  $R_f = 0.49$  (3:7 hexanes:EtOAc);  $[\alpha]_D^{20} = +60.8^\circ$  ( $c = 0.83$ ,  $\text{CHCl}_3$ );  $^1\text{H}$  NMR ( $\text{C}_6\text{D}_6$ , 500 MHz, 35 °C)  $\delta$  9.38 (brs, 1H), 7.20- 7.09 (m, 4H), 7.10 (m, 3H), 7.03- 6.95 (m, 3H), 4.68 (dd,  $J = 8.3, 5.3$  Hz, 1H), 4.43 (d,  $J = 15.1$  Hz, 1H), 4.45- 4.39 (brs, 2H), 4.20 (d,  $J = 15.1$  Hz, 1H), 4.15 (d,  $J = 11.7$  Hz, 1H), 4.06 (12.2 Hz, 1H), 3.70 (s, 1H), 3.65 (d,  $J = 9.2$  Hz, 1H), 3.50 (brs, 1H), 3.44 (ddd,  $J = 9.2, 9.2, 3.9$  Hz, 1H), 3.31 (ddd,  $J = 10.2, 5.3, 5.3$  Hz, 1H), 3.09 (bs, 1H), 2.42 (dddd,  $J = 14.1, 9.1, 4.8, 4.5$  Hz, 1H), 2.23 (dddd,  $J = 14.3, 8.7, 4.8, 4.6$  Hz, 1H), 1.62 (s, 9H), 1.60 (s, 9H), 1.40 (s, 9H) ppm;  $^{13}\text{C}$  NMR ( $\text{C}_6\text{D}_6$ , 125 MHz, 35 °C)  $\delta$  159.7, 155.5, 150.6, 148.5, 138.7, 135.9, 129.2, 128.7, 128.6, 128.3, 128.2, 128.1, 127.9, 127.8, 86.2, 82.1, 79.9, 79.1, 78.7, 72.9, 65.6, 65.4, 64.1, 47.1, 30.1, 28.6, 28.1, 27.9 ppm; IR (neat) 3365, 2977, 2931, 2360, 1798, 1724, 1616, 1454, 1390, 1366, 1318, 1246, 1131, 1103, 1028, 808, 751, 703, 667  $\text{cm}^{-1}$ ; HRMS (ESI) calcd for  $\text{C}_{40}\text{H}_{53}\text{N}_7\text{O}_{11}\text{Na}$  (M+Na): 830.3701, found: 830.3700.

**The sequential one pot procedure for the preparation of cyclic carbamate (9).**

To a solution of *bis*-guanidine **5** (50 mg, 57  $\mu\text{mol}$ ) in  $\text{CH}_2\text{Cl}_2$  (500  $\mu\text{L}$ ) was added  $\text{AgOAc}$  (10 mg, 59  $\mu\text{mol}$ ) at rt. The contents of the flask were stirred at rt for 1h. The reaction mixture was concentrated to dryness and the residue was dissolved in  $\text{Et}_2\text{O}$  (1.0 mL). To the reaction mixture was then added  $\text{AgOAc}$  (10 mg, 59  $\mu\text{mol}$ ) and crushed iodine (15 mg, 59  $\mu\text{mol}$ ) and the contents were stirred at rt for 10 h. The  $\text{Et}_2\text{O}$  was evaporated under reduced pressure and the contents were diluted with  $\text{CH}_3\text{CN}$  (1.0 mL) and  $\text{AcOH}$  (16  $\mu\text{L}$ , 30

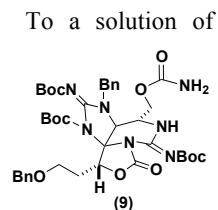

$\mu\text{mol}$ ). Additional  $\text{AgOAc}$  (19 mg, 113  $\mu\text{mol}$ ) was added and the contents were heated at 60 °C for 8 h. The flask was cooled to rt and the contents were diluted with  $\text{EtOAc}$  (2 mL) and then filtered through a small pad of celite. The celite bed was washed with an additional portion of  $\text{EtOAc}$  (5 mL). The combined filtrates were concentrated under reduced pressure. Purification by flash column chromatography (50%  $\text{EtOAc}$  in hexanes) gave the cyclic carbamate **9** (31 mg, 67%) as a colorless oil.

**(3aR,4R,10S,10aS)-tert-butyl 2,8-bis((tert-butoxycarbonyl)imino)-10-((carbamoyloxy)methyl)-4-(2-((methylsulfonyl)oxy)ethyl)-6-oxohexahydro-1H-oxazolo[3,4-c]purine-3(2H)-carboxylate (10).**

In a 100 mL pressure tube, cyclic carbamate **9** (0.80 g, 0.99 mmol) was dissolved in  $\text{PrOH}$  (20 mL). To this solution was added  $\text{Pd}(\text{OH})_2$  (120 mg) and  $\text{AcOH}$  (200  $\mu\text{L}$ ). The tube was evacuated and filled with hydrogen three times. Finally the hydrogen was filled to 80-psi pressure and the contents of the tube were stirred at rt behind a safety shield for 50 h. The reaction mixture was diluted with  $\text{EtOAc}$  and filtered through a small pad of celite. The celite bed was washed with an additional 20 mL of  $\text{EtOAc}$ . The combined filtrates were concentrated under reduced pressure and purified by flash column chromatography (5%  $\text{MeOH}$  in  $\text{CH}_2\text{Cl}_2$ ) to yield the di-debenzylated carbamate (0.416 g, 67%) as colorless oil.

TLC  $R_f$  = 0.37 (9:1  $\text{CH}_2\text{Cl}_2$ : $\text{MeOH}$ );  $[\alpha]_D^{20}$  = +73.3° ( $c$  = 3.52,  $\text{CHCl}_3$ );  $^1\text{H}$  NMR ( $\text{CDCl}_3$ , 500 MHz, 35 °C)  $\delta$  9.79 (brs, 1H), 5.37 (brs, 2H), 4.92 (dd,  $J$  = 7.8, 4.8 Hz, 1H), 4.51 (s, 1H), 4.27- 4.21 (m, 2H), 3.99 (brt, 1H), 3.83-3.75 (m, 3H), 2.01 (ddd,  $J$  = 19.0, 10.7, 4.3 Hz, 1H), 1.94 (ddd,  $J$  = 20.0, 7.8, 5.3 Hz, 1H), 1.57 (s, 9H), 1.49 (s, 9H), 1.48 (s, 9H) ppm;  $^{13}\text{C}$  NMR ( $\text{CDCl}_3$ , 125 MHz, 35 °C)  $\delta$  156.3, 151.5, 151.2, 149.7, 147.2, 128.1, 127.9, 127.8, 88.4, 82.5, 81.4, 80.7, 80.5, 72.0, 66.0, 58.0, 55.2, 30.9, 28.3, 28.2, 28.0 ppm; IR (neat) 3290, 2979, 2360, 1791, 1761, 1713, 1653, 1608, 1525, 1473, 1455, 1367, 1326, 1244, 1146, 1108, 1078, 907, 855, 805, 769, 726, 645  $\text{cm}^{-1}$ ; HRMS ( $\text{ES}^+$ ) calcd for  $\text{C}_{26}\text{H}_{41}\text{N}_7\text{O}_{11}\text{Na}$  ( $\text{M}+\text{Na}$ ): 650.2762, found: 650.2762.

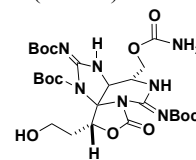

In a 10 ml round bottom flask, the free alcohol prepared above (130 mg, 207  $\mu\text{mol}$ ) was dissolved in  $\text{CH}_2\text{Cl}_2$  (4.0 mL) and the flask was cooled to -35 °C ( $\text{CH}_3\text{CN}$ /dry ice). To this mixture was added  $\text{NEt}_3$  (87  $\mu\text{L}$ , 621  $\mu\text{mol}$ ) and DMAP (50 mg, 409  $\mu\text{mol}$ ). A solution of methanesulfonyl chloride (16  $\mu\text{L}$ , 207  $\mu\text{mol}$ ) in  $\text{CH}_2\text{Cl}_2$  (300  $\mu\text{L}$ ) was added drop wise to this solution. The reaction mixture was stirred at the same temperature for 2 h and then diluted with  $\text{CH}_2\text{Cl}_2$  (5 mL) and  $\text{H}_2\text{O}$  (5 mL). The contents of the flask were partitioned in a separatory funnel and washed with 0.5% aq.  $\text{HCl}$  (5 mL). The organic layer was separated and the aqueous layer was extracted with  $\text{CH}_2\text{Cl}_2$  (2  $\times$  10 mL). The combined organic layers were dried over  $\text{Na}_2\text{SO}_4$  and concentrated under reduced pressure. Purification by flash column chromatography (3%  $\text{MeOH}$  in  $\text{CH}_2\text{Cl}_2$ ) gave the sulfonate **10** (113 mg, 77%) as a colorless foam.

TLC  $R_f$  = 0.48 (9:1  $\text{CH}_2\text{Cl}_2$ : $\text{MeOH}$ );  $[\alpha]_D^{20}$  = +43.5° ( $c$  = 2.05,  $\text{CHCl}_3$ );  $^1\text{H}$  NMR ( $\text{CDCl}_3$ , 500MHz)  $\delta$  9.86– 9.41(brs, 2H), 4.97 (brs, 2H), 4.82 (dd,  $J$  = 8.3, 4.8 Hz, 1H), 4.46- 4.37 (m, 3H), 4.29 (dd,  $J$  = 11.7, 3.9Hz, 1H), 4.24 (dd,  $J$  = 11.7, 5.8 Hz, 1H), 4.02 (brs, 1H), 3.10 (s, 3H), 2.20 (ddd,  $J$  = 13.1, 9.7, 4.8 Hz, 2H), 1.59 (s, 9H), 1.51 (s, 9H), 1.49 (s, 9H) ppm;  $^{13}\text{C}$  NMR ( $\text{CDCl}_3$ , 125 MHz, 35 °C)  $\delta$  156.0, 151.1, 150.4, 149.4, 146.9, 88.7, 82.6, 80.8, 80.2, 80.0, 71.9, 65.6, 65.1, 55.1, 37.6, 28.3, 28.2, 28.1, 27.9 ppm; IR (neat) 3294, 2979, 2360, 2338, 1791, 1733, 1604, 1473, 1456, 1394, 1368, 1330, 1248, 1146, 1042, 961, 915, 775, 730, 646  $\text{cm}^{-1}$ ; HRMS ( $\text{ES}^+$ ) calcd for  $\text{C}_{27}\text{H}_{43}\text{N}_7\text{O}_{13}\text{SNa}$  ( $\text{M}+\text{Na}$ ): 728.2537, found: 728.2538.

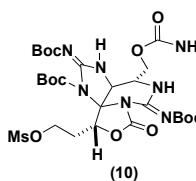

**(3aS,4S,10S,10aR)-tert-butyl 2,6-bis((tert-butoxycarbonyl)imino)-4-((carbamoyloxy)methyl)-10-hydroxyoctahydropyrrolo[1,2-c]purine-1(8H)-carboxylate (11).** To a solution of sulfonate **10** (30 mg, 42  $\mu\text{mol}$ ) in  $\text{EtOH}$  (1.0 mL) was added  $\text{Cs}_2\text{CO}_3$  (15 mg, 46  $\mu\text{mol}$ ) at 0 °C. Reaction mixture was slowly warmed to rt and stirred for 8 h. The contents of the flask were filtered through a small pad of celite and the celite bed was washed with 10 mL of  $\text{EtOAc}$ . The combined filtrates were concentrated under reduced pressure. Purification by flash column chromatography (5%  $\text{MeOH}$  in  $\text{CH}_2\text{Cl}_2$ ) gave the alcohol **11** (15 mg, 61 %) as a colorless oil.

TLC  $R_f$  = 0.37 (9:1  $\text{CH}_2\text{Cl}_2$ : $\text{MeOH}$ ),  $[\alpha]_D^{20}$  = +84.6° ( $c$  = 2.80,  $\text{CHCl}_3$ ),  $^1\text{H}$  NMR ( $\text{CDCl}_3$ , 500 MHz, **complex mixture of rotamers**)  $\delta$  9.6– 9.1 (brs, 1H), 5.7- 5.3 (brs, 2H), 4.46 (t,  $J$  = 4.1 Hz, 1H), 4.30- 4.05 (m, 3H), 3.85-3.73 (m, 2H), 3.41 (dd,  $J$  = 11.2, 5.8 Hz, 1H), 2.24 (dddd,  $J$  = 10.0, 10.0, 6.8, 7.8 Hz, 1H), 1.87 (dddd,  $J$  = 12.7, 8.3, 4.4, 3.9 Hz, 1H), 1.50 (s, 9H), 1.44 (s, 18H) ppm.  $^{13}\text{C}$  NMR ( $\text{CDCl}_3$ , 125 MHz, **complex mixture of rotamers**)  $\delta$  164.1, 163.7, 160.0, 159.4, 157.3, 157.0, 156.8, 156.6, 151.4, 149.6, 149.2, 88.4, 87.6, 85.7, 83.9, 83.1, 82.4, 81.7, 81.1, 80.8, 79.0, 78.9, 78.8, 78.7, 77.4, 76.7, 71.9, 68.2, 67.0, 64.4, 63.5, 59.6, 53.9, 53.1, 52.9, 48.8, 48.1, 43.9, 30.7, 28.6, 28.5, 28.4, 28.3, 28.3, 28.2, 27.9 ppm; IR (neat) 3285, 2978, 2360, 2339, 1717, 1635, 1584, 1558, 1473, 1393, 1367, 1317, 1248, 1147, 1094 911, 806, 756, 731  $\text{cm}^{-1}$ ; HRMS (ESI) calcd for  $\text{C}_{25}\text{H}_{41}\text{N}_7\text{O}_9\text{Na}$  ( $\text{M}+\text{Na}$ ): 606.2863, found: 606.2864.

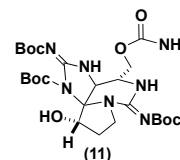

**$\beta$ -saxitoxinol • 2TFA.** To the alcohol **11** (12 mg, 20  $\mu$ mol) was added  $\text{CH}_2\text{Cl}_2$ : TFA (1:1, 1 mL) and the reaction mixture was stirred at rt for 1 h. The contents of the flask were concentrated under reduced pressure. This residue was washed with  $\text{CH}_2\text{Cl}_2$  several times and concentrated again under reduced pressure. The resultant residue was dissolved in 1 mL of  $\text{H}_2\text{O}$  and filtered through a 25 micron PTFE Acrodisc® syringe filter. The filter was washed with an additional 1 mL of  $\text{H}_2\text{O}$  and the filtrates were concentrated under reduced pressure to give the bis-TFA salt of  $\beta$ -saxitoxinol (9 mg, 95%) as a colorless oil.

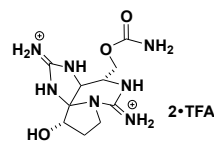

$[\alpha]_{\text{D}}^{20} = +63.0^\circ$  ( $c = 0.13$ , MeOH);  $^1\text{H NMR}$  ( $\text{D}_2\text{O}$ , 500 MHz)  $\delta$  4.83 (s, 1H), 4.33 (d,  $J = 4.4$  Hz, 1H), 4.27 (dd,  $J = 11.7, 9.2$  Hz, 1H), 4.02 (dd,  $J = 11.7, 5.3$  Hz, 1H), 3.83 (ddd,  $J = 9.2, 5.3, 1.7$  Hz, 1H), 3.77 (ddd,  $J = 10.2, 8.3, 1.9$  Hz, 1H), 3.68 (dd,  $J = 9.0, 9.0, 8.7$  Hz, 1H), 2.40 (dddd,  $J = 14.1, 9.7, 9.7, 3.9$  Hz, 1H), 2.23 (ddd,  $J = 14.1, 7.3, 1.2$  Hz, 1H) ppm;  $^{13}\text{C NMR}$  ( $\text{D}_2\text{O}$ , 125 MHz)  $\delta$  159.6, 158.3, 156.4, 84.0, 75.1, 63.7, 58.3, 53.5, 44.3, 29.3 ppm; HRMS ( $\text{ES}^+$ ) calcd for  $\text{C}_{10}\text{H}_{18}\text{N}_7\text{O}_3$  ( $\text{M}+\text{H}$ ): 284.1471, found: 284.1473.

**(+)-saxitoxin • 2TFA.** The bis guanidine **11** (15 mg, 25  $\mu$ mol) was dissolved in  $\text{CH}_2\text{Cl}_2$  (2.5 mL) and Dess- Martin Periodinane (16 mg, 38  $\mu$ mol) was added to this solution at rt. The reaction mixture was stirred for 2 h and filtered through a small pad of celite. The celite pad was washed with an additional  $\text{CH}_2\text{Cl}_2$  (3 mL) and the combined filtrates were transferred to a separatory funnel. The organic layer was washed with 10% aqueous solution of  $\text{Na}_2\text{S}_2\text{O}_3$  (5 mL). The organic layer was then separated, dried over  $\text{Na}_2\text{SO}_4$  and concentrated under reduced pressure to yield ketone (18 mg, crude weight) as a colorless foam. This compound is unstable and hence used as such in the next step without further purification.

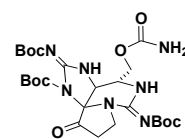

HRMS ( $\text{ES}^+$ ) calcd for  $\text{C}_{25}\text{H}_{39}\text{N}_7\text{O}_9\text{Na}$  ( $\text{M}+\text{Na}$ ): 604.2692, found: 604.2707.

The crude ketone (18 mg, 30.96  $\mu$ mol) was dissolved in  $\text{CH}_2\text{Cl}_2$ : TFA (1:1, 1 mL) and stirred at rt for 1 h. The contents of the flask were concentrated under reduced pressure. The resultant residue was washed with  $\text{CH}_2\text{Cl}_2$  several times and concentrated again under reduced pressure. This semisolid was then dissolved in 1 mL of  $\text{H}_2\text{O}$  and filtered through a 25 micron PTFE Acrodisc® syringe filter. The syringe filter was washed with an additional 1 mL of  $\text{H}_2\text{O}$ . The combined filtrates were concentrated under reduced pressure to afford the bis-TFA salt of (+)-saxitoxin (11 mg, 81% over 2 steps) as a colorless oil.

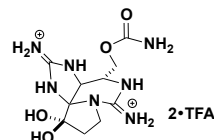

$[\alpha]_{\text{D}}^{20} = +78.1^\circ$  ( $c = 0.3$ , MeOH);  $^1\text{H NMR}$  ( $\text{D}_2\text{O}$ , 500 MHz)  $\delta$  4.72 (d,  $J = 0.9$  Hz, 1H), 4.26 (dd,  $J = 11.2, 9.2$  Hz, 1H), 3.99 (dd,  $J = 11.7, 5.3$  Hz, 1H), 3.80 (ddd,  $J = 9.2, 5.3, 0.9$  Hz, 1H), 3.77 (ddd,  $J = 10.2, 8.3, 1.9$  Hz, 1H), 3.60- 3.53 (m, 1H), 2.40 (ddd,  $J = 14.1, 8.3, 1.9$  Hz, 1H), 2.32 (ddd,  $J = 14.1, 9.7, 9.7$  Hz, 1H) ppm;  $^{13}\text{C NMR}$  ( $\text{D}_2\text{O}$ , 125 MHz)  $\delta$  159.6, 158.4, 156.6, 99.1, 83.0, 63.7, 57.6, 53.6, 43.4, 33.5 ppm; HRMS ( $\text{ES}^+$ ) calcd for  $\text{C}_{10}\text{H}_{18}\text{N}_7\text{O}_4$  ( $\text{M}+\text{H}$ ): 300.1420, found: 300.1431.

**Propargyl guanidine (12).** To a solution of diamine (151 mg, 223  $\mu$ mol) in  $\text{CH}_2\text{Cl}_2$  (2.5 mL), *N,N'*-Di-Boc-*S*-methylisothiourea (68 mg, 234  $\mu$ mol) was added followed by  $\text{HgO}$  (49 mg, 226  $\mu$ mol) and  $\text{NEt}_3$  (47  $\mu$ L, 326  $\mu$ mol). The contents of the flask were stirred at rt for 8 h. The reaction mixture was then diluted with  $\text{CH}_2\text{Cl}_2$  (5 mL) and filtered through a small pad of celite. The celite bed was washed with an additional  $\text{CH}_2\text{Cl}_2$  (2 mL) and the combined filtrates were concentrated under reduced pressure to yield a colorless foam. Purification by flash silica gel column chromatography (10% EtOAc in hexanes) gave the propargyl guanidine **12** (149 mg, 72%) as a colorless foam.

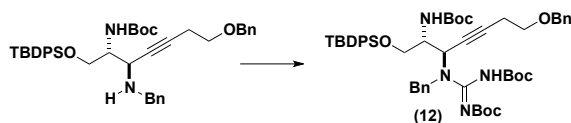

TLC  $R_f = 0.41$  (8:2 Hexanes: EtOAc);  $[\alpha]_{\text{D}}^{20} = -54.1^\circ$  ( $c = 0.51$ ,  $\text{CHCl}_3$ );  $^1\text{H NMR}$  ( $\text{C}_6\text{D}_6$ , 500 MHz):  $\delta$  10.74 (s, 1H), 7.83- 7.80 (m, 4H), 7.34- 7.17 (m, 10H), 7.16- 6.97 (m, 6H), 6.29 (brs, 1H), 4.99 (d,  $J = 9.76$  Hz, 1H), 4.80 (d,  $J = 16.1$  Hz, 1H), 4.72 (d,  $J = 16.1$  Hz, 1H), 4.44- 4.20 (m, 1H), 4.19 (s, 2H), 4.13 (d,  $J = 9.2$  Hz, 1H), 3.80 (dd,  $J = 10.7, 3.4$  Hz, 1H), 3.23 (dt,  $J = 7.3, 5.3$  Hz, 2H), 2.23 (dt,  $J = 6.8, 5.8$  Hz, 2H), 1.44 (s, 9H), 1.38 (s, 9H), 1.21 (s, 9H), 1.20 (s, 9H) ppm;  $^{13}\text{C NMR}$  ( $\text{C}_6\text{D}_6$ , 125 MHz)  $\delta$  163.5, 156.5, 155.2, 152.1, 150.1, 138.9, 138.1, 136.2, 136.1, 133.8, 133.5, 129.9, 129.8, 128.8, 128.5, 128.1, 128.0, 127.8, 127.3, 127.3, 83.0, 81.2, 78.9, 78.7, 77.9, 72.7, 68.3, 54.6, 52.3, 50.3, 28.4, 28.2, 27.8, 27.2, 20.4, 19.5 ppm; IR (neat) 2976, 2931, 2857, 2360, 2339, 1771, 1700, 1616, 1558, 1569, 1496, 1436, 1393, 1290, 1232, 1140, 1113, 824, 739, 700  $\text{cm}^{-1}$ ; HRMS ( $\text{ES}^+$ ) calcd for  $\text{C}_{53}\text{H}_{70}\text{N}_4\text{O}_8\text{SiNa}$  ( $\text{M}+\text{Na}$ ): 941.4861, found: 941.4885.

**(*S*,*5Z*)-*tert*-butyl 3-benzyl-5-(3-(benzyloxy)propylidene)-2-((*tert*-butoxycarbonyl)imino)-4-((*R*)-2,2,10,10-tetramethyl-8-oxo-3,3-diphenyl-4,9-dioxa-7-aza-3-silaundecan-6-yl)imidazolidine-1-carboxylate (**13**).** To a solution of the propargyl guanidine **12** (38 mg, 56  $\mu$ mol) in  $\text{CH}_2\text{Cl}_2$  (500  $\mu$ L) was added AgOAc (1 mg, 59  $\mu$ mol). The contents of the flask were stirred for 9 h and filtered through a syringe filter. The filter was washed with an additional portion of  $\text{CH}_2\text{Cl}_2$  (1 mL) and the combined filtrates were concentrated under reduced pressure to yield ene-guanidine **13** (35 mg, 91%) as a colorless foam.

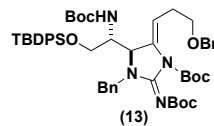

TLC  $R_f$  = 0.25 (8:2 Hexanes:EtOAc);  $[\alpha]_D^{20}$  = +43.9° (c = 1.83,  $\text{CHCl}_3$ );  $^1\text{H}$  NMR ( $\text{C}_6\text{D}_6$ , 500 MHz):  $\delta$  7.60–7.5 (m, 4H), 7.26 (d,  $J$  = 7.3 Hz, 2H), 7.20–7.07 (m, 11H), 6.98–6.93 (m, 3H), 5.36 (d,  $J$  = 15.6 Hz, 1H), 5.09 (dd,  $J$  = 8.7, 4.3 Hz, 1H), 4.42–4.36 (m, 1H), 4.30 (d,  $J$  = 15.1 Hz, 1H), 4.28 (d,  $J$  = 12.2 Hz, 2H), 4.24 (d,  $J$  = 12.2 Hz, 1H), 4.16 (d,  $J$  = 10.2 Hz, 1H), 4.10 (s, 1H), 3.64 (dd,  $J$  = 10.2, 6.8 Hz, 1H), 3.43 (t,  $J$  = 9.7 Hz, 1H), 3.26–3.16 (m, 2H), 2.57–2.51 (m, 1H), 2.43–2.39 (m, 1H), 1.65 (s, 9H), 1.45 (s, 9H), 1.42 (s, 9H), 0.99 (s, 9H) ppm;  $^{13}\text{C}$  NMR ( $\text{C}_6\text{D}_6$ , 125 MHz)  $\delta$  159.2, 155.6, 152.0, 149.5, 139.1, 136.5, 135.9, 135.8, 133.3, 133.0, 131.0, 130.2, 130.1, 128.9, 128.5, 128.4, 128.2, 128.1, 127.8, 127.6, 127.5, 118.1, 83.3, 80.1, 77.9, 72.8, 68.8, 62.6, 58.4, 51.4, 46.5, 29.6, 28.6, 28.4, 28.2, 26.9, 19.1 ppm; IR (neat) 2974, 2930, 2857, 2360, 2339, 1751, 1717, 1699, 1684, 1646, 1635, 1521, 1506, 1472, 1419, 1365, 1293, 1249, 1147, 1112, 1027, 850, 823, 742, 701, 667, 614  $\text{cm}^{-1}$ ; HRMS (ESI) calcd for  $\text{C}_{53}\text{H}_{70}\text{N}_4\text{O}_8\text{SiNa}$  (M+Na): 941.4861, found: 941.4860.

### 3. Representative $^1\text{H}$ NMR and $^{13}\text{C}$ NMR spectra

VRB-04-028  
 HNMR-benzene-d6  
 500MHz

Pulse Sequence: s2pul  
 Solvent: Benzene  
 Temp. 25.0 C / 298.1 K  
 File: VRB-04-028-HNMR-benzene-d6-500MHz-for-pub  
 INOVA-500 'nmr-sun'

Pulse 33.5 degrees  
 Acq. time 1.892 sec  
 Width 8000.0 Hz  
 34 repetitions  
 OBSERVE H1, 499.8137320 MHz  
 DATA PROCESSING  
 FT size 32768  
 Total time 5 hr, 16 min, 48 sec

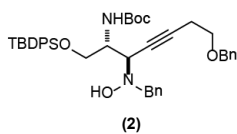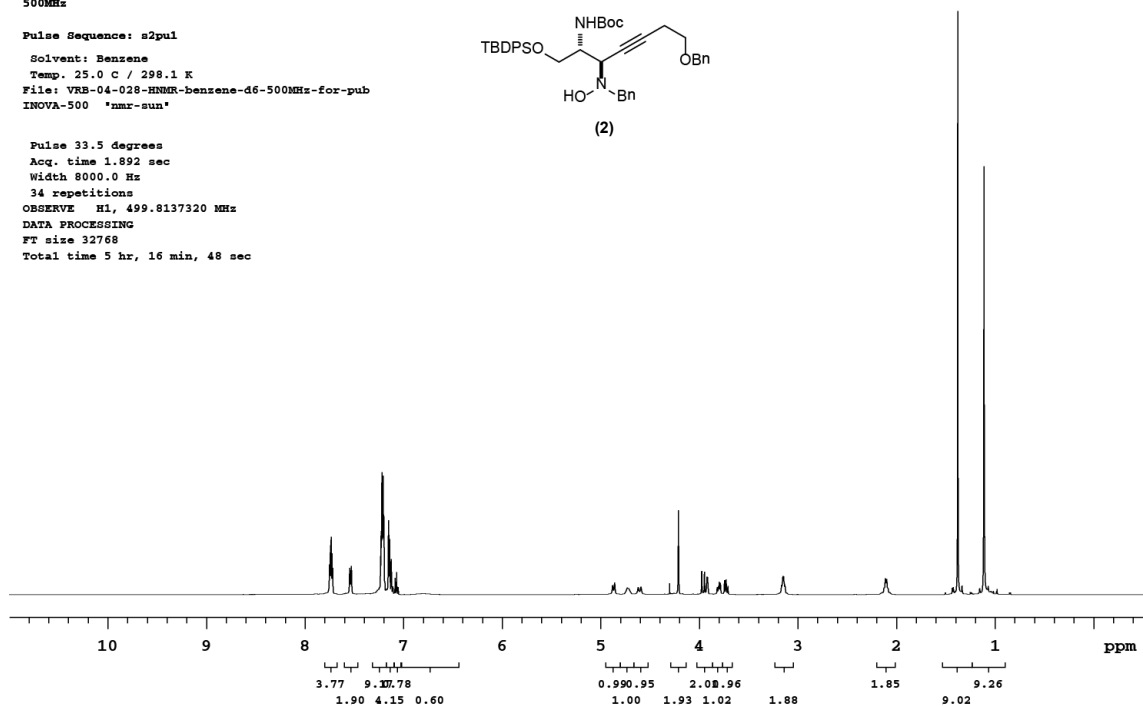

VRB-04-028  
 C13-NMR-Benzene-d6  
 500MHz

Pulse Sequence: s2pul  
 Solvent: Benzene  
 Temp. 25.0 C / 298.1 K  
 User: 1-14-87  
 File: VRB-04-028-C13-NMR-benzene-d6-500MHz-for-pub  
 INOVA-500 'nmr-sun'

Relax. delay 1.000 sec  
 Pulse 83.1 degrees  
 Acq. time 1.300 sec  
 Width 25000.0 Hz  
 1082 repetitions  
 OBSERVE C13, 125.6782251 MHz  
 DECOUPLE H1, 499.8162438 MHz  
 Power 44 dB  
 continuously on  
 WALTZ-16 modulated  
 DATA PROCESSING  
 Line broadening 0.5 Hz  
 FT size 65536  
 Total time 641 hr, 29 min, 46 sec

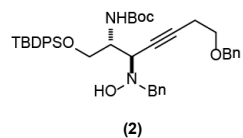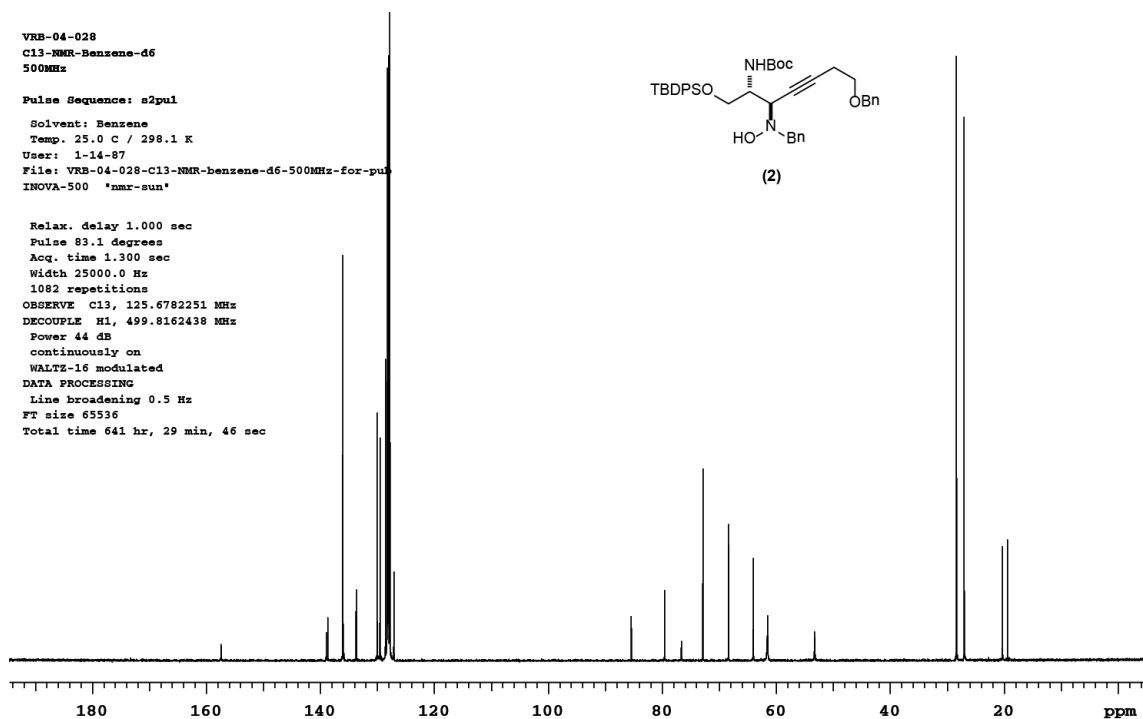





VRB-03-027-crude  
HNMR-CD3OD  
500MHz  
10-16-10

Pulse Sequence: s2pul

Solvent: cd3od  
Temp. 25.0 C / 298.1 K  
File: VRB-04-027-HNMR-CD3OD-500MHz-crude  
INOVA-500 'nmr-sun'

Pulse 34.2 degrees  
Acq. time 1.892 sec  
Width 8000.0 Hz  
154 repetitions  
OBSERVE H1, 499.8156702 MHz  
DATA PROCESSING  
FT size 32768  
Total time 31 min, 40 sec

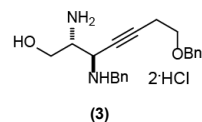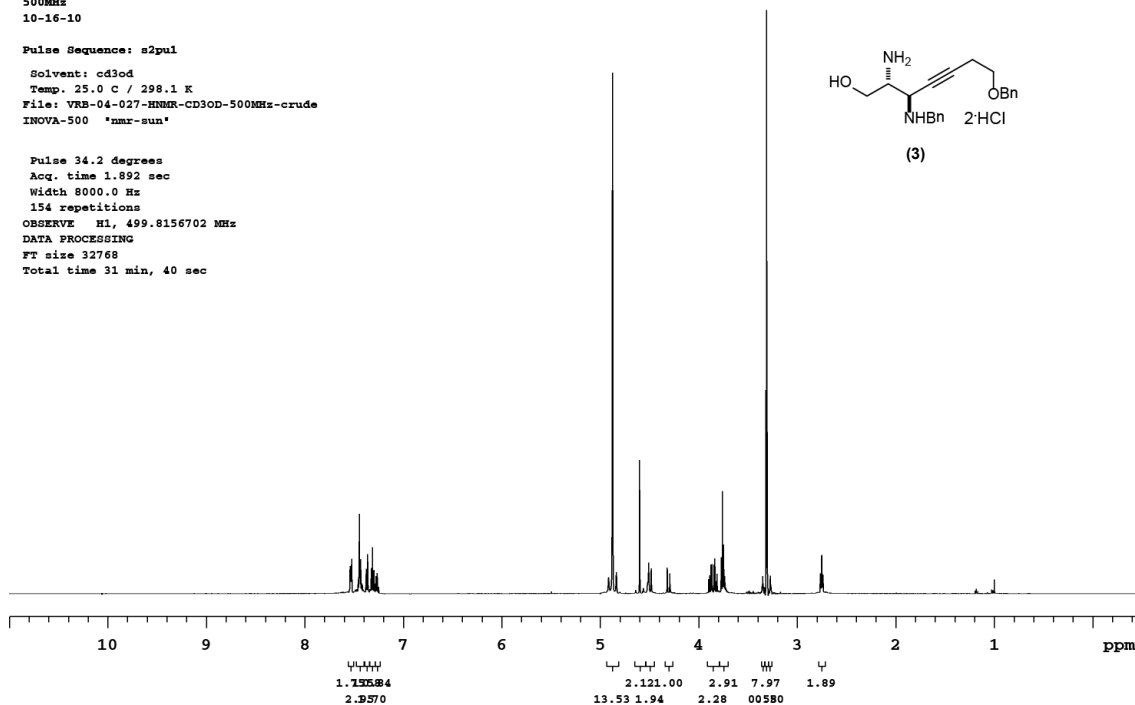

STANDARD CARBON PARAMETERS

Pulse Sequence: s2pul

Solvent: cd3od  
Temp. 25.0 C / 298.1 K  
User: 1-14-87  
File: VRB-04-027-C13-NMR-CD3OD-500MHz-for-pub  
INOVA-500 'nmr-sun'

Relax. delay 1.000 sec  
Pulse 83.1 degrees  
Acq. time 1.300 sec  
Width 25000.0 Hz  
1048 repetitions  
OBSERVE C13, 125.6785733 MHz  
DECOUPLE H1, 499.8181681 MHz  
Power 44 dB  
continuously on  
WALTZ-16 modulated  
DATA PROCESSING  
Line broadening 0.5 Hz  
FT size 65536  
Total time 64 hr, 8 min, 58 sec

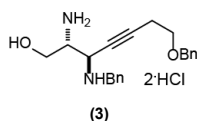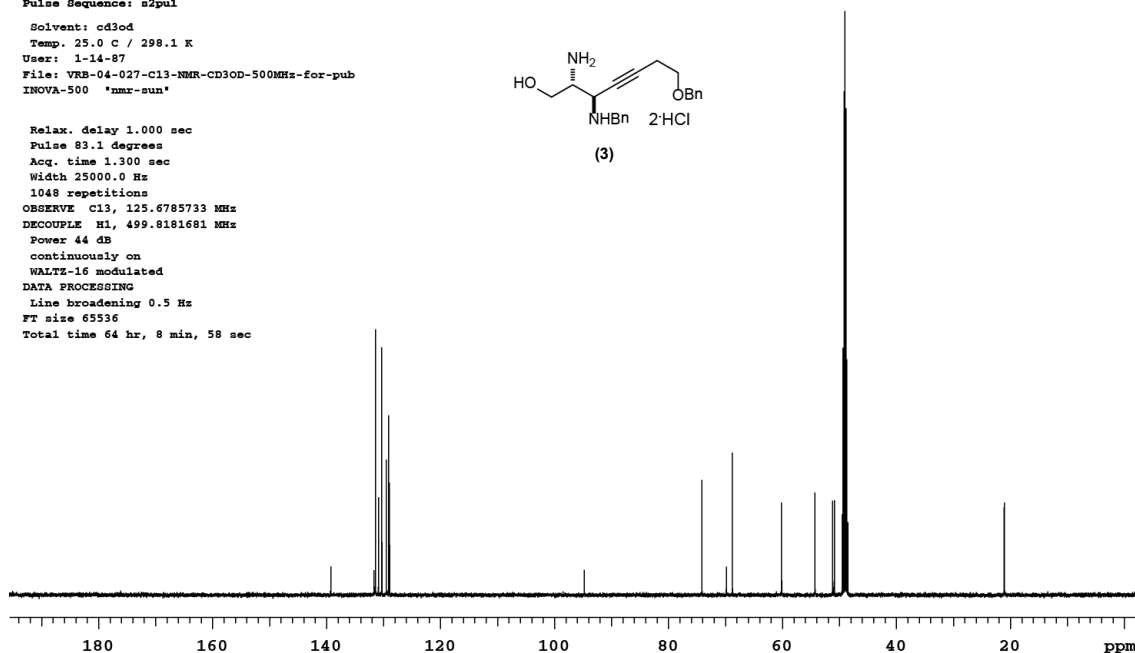

VRB-04-108  
HNMR-benzene-d6  
500MHz

Pulse Sequence: s2pul

Solvent: Benzene  
Temp. 25.0 C / 298.1 K

File: VRB-04-108-HNMR\_benzene-d6-500MHz-pure-for-pub  
INOVA-500 'nmr-sun'

Pulse 33.5 degrees  
Acq. time 1.892 sec  
Width 8000.0 Hz  
120 repetitions  
OBSERVE H1, 499.8137320 MHz  
DATA PROCESSING  
FT size 32768  
Total time 31 min, 40 sec

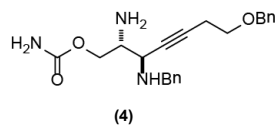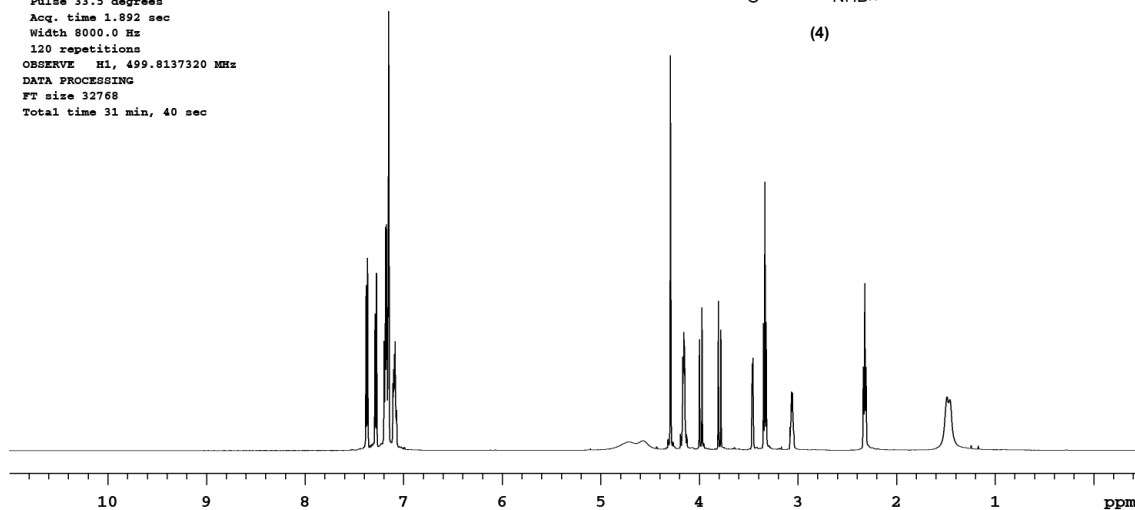

VRB-04-108  
C13-NMR-benzene-d6  
500MHz

Pulse Sequence: s2pul

Solvent: Benzene  
Temp. 25.0 C / 298.1 K  
User: 1-14-87

File: VRB-04-108-C13-NMR-benzene-d6-500MHz  
INOVA-500 'nmr-sun'

Relax. delay 1.000 sec  
Pulse 83.1 degrees  
Acq. time 1.300 sec  
Width 25000.0 Hz  
3040 repetitions  
OBSERVE C13, 125.6782235 MHz  
DECOUPLE H1, 499.8162438 MHz  
Power 44 dB  
continuously on  
WALTZ-16 modulated  
DATA PROCESSING  
Line broadening 0.5 Hz  
FT size 65536  
Total time 641 hr, 29 min, 46 sec

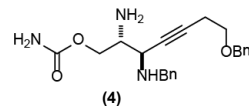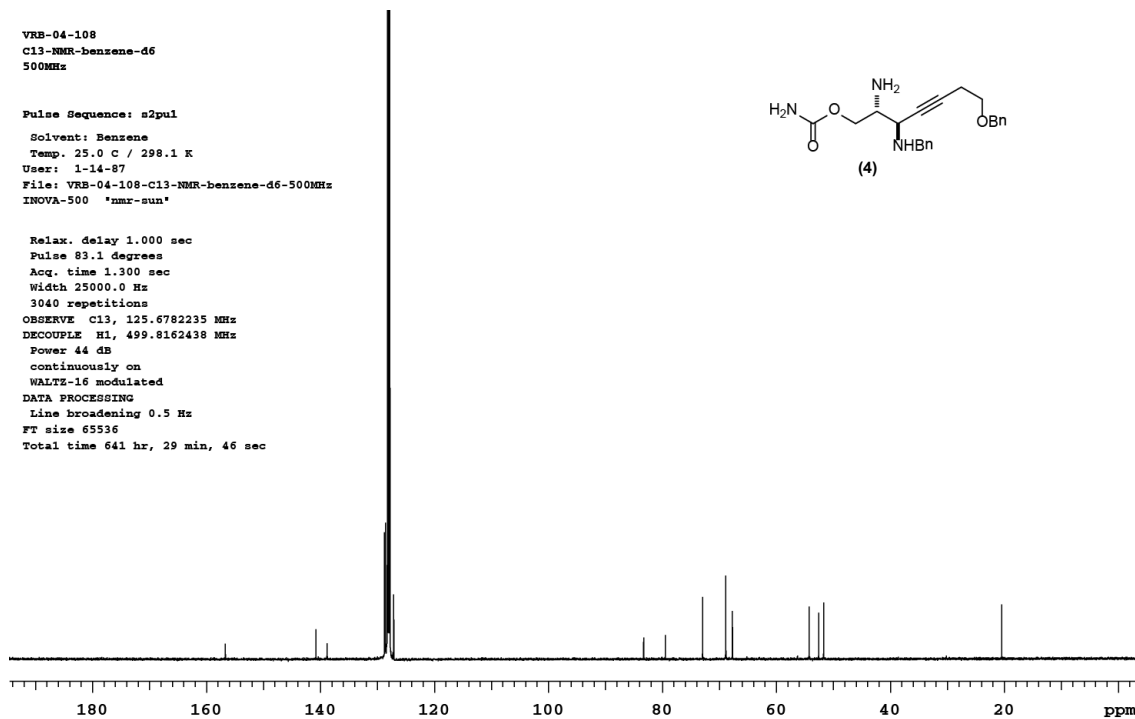

VRB-04-052-55-degrees  
HNMR-Benzene-d6  
500-B-MHz

File: VRB-04-052-HNMR-benzene-d6-55-degrees-500B

Pulse Sequence: s2pul

Solvent: c6d6  
Temp. 55.0 C / 328.1 K  
Operator: vasudev  
File: VRB-04-052-HNMR-benzene-d6-55-degrees-500B  
INOVA-500 \*nmr-sun\*

Relax. delay 1.000 sec  
Pulse 45.0 degrees  
Acq. time 2.050 sec  
Width 7993.6 Hz  
64 repetitions  
OBSERVE H1, 499.6157129 MHz  
DATA PROCESSING  
FT size 32768  
Total time 3 min, 15 sec

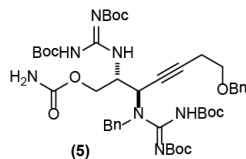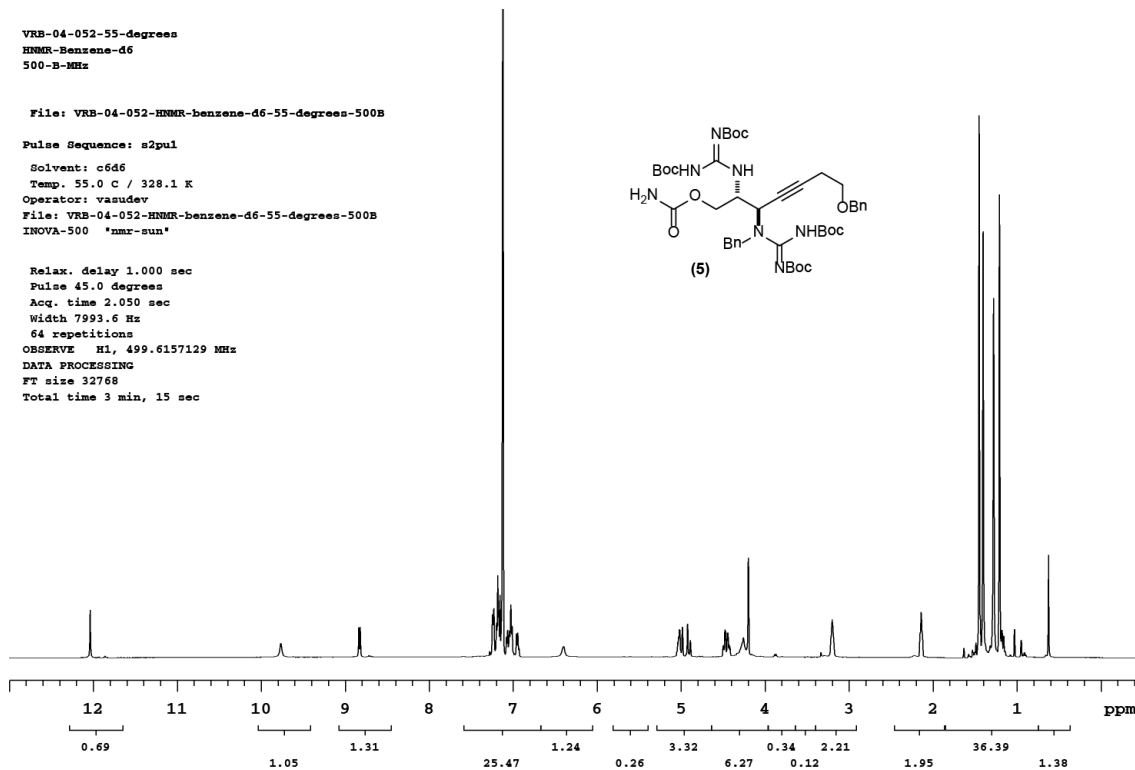

VRB-04-052-pure  
C13NMR-benzene-d6-RT  
B-500MHz  
09-05-11

File: VRB-04-052-C13-NMR-BENZENE-D6-500BMHz-PURE-FOR-PUB-09-06-11

Pulse Sequence: s2pul

Solvent: c6d6  
Temp. 26.0 C / 299.1 K  
Operator: vasudev  
File: VRB-04-052-C13-NMR-BENZENE-D6-500BMHz-PURE-FOR-PUB-09-06-11  
INOVA-500 \*nmr-sun\*

Relax. delay 1.000 sec  
Pulse 45.0 degrees  
Acq. time 1.043 sec  
Width 31409.5 Hz  
45304 repetitions  
OBSERVE C13, 125.6283797 MHz  
DECOUPLE H1, 499.6182109 MHz  
Power 38 dB  
continuously on  
WALTZ-16 modulated  
DATA PROCESSING  
Line broadening 0.5 Hz  
FT size 65536  
Total time 5700 hr, 40 min, 26 sec

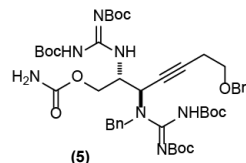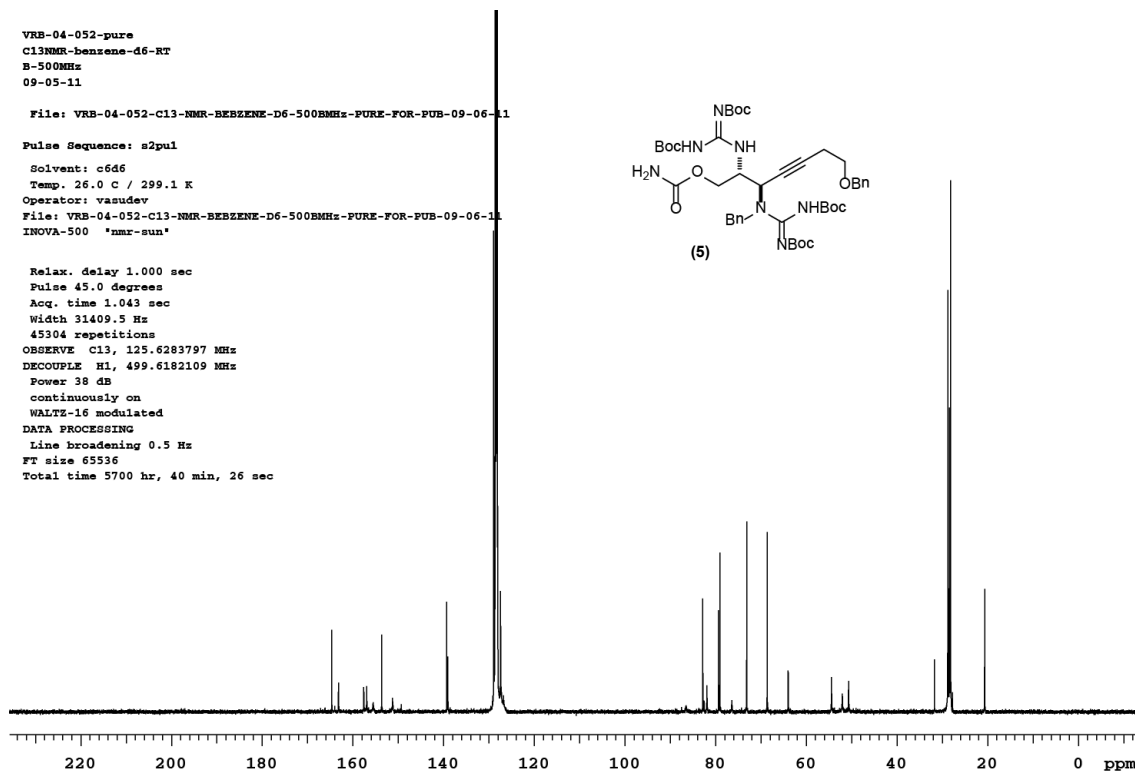

VRB-04-053-35-degrees  
HNMR-benzene-d6  
B-500MHz

File: VRB-04-053-HNMR-35-degrees-benzene-d6-B-500MHz

Pulse Sequence: s2pul

Solvent: c6d6  
Temp. 35.0 C / 308.1 K  
Operator: vasudev  
File: VRB-04-053-HNMR-35-degrees-benzene-d6-B-500MHz  
INOVA-500 'nmr-sun'

Relax. delay 1.000 sec  
Pulse 45.0 degrees  
Acq. time 2.050 sec  
Width 7993.6 Hz  
108 repetitions  
OBSERVE H1, 499.6156993 MHz  
DATA PROCESSING  
FT size 32768  
Total time 52 min, 11 sec

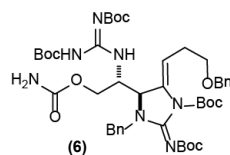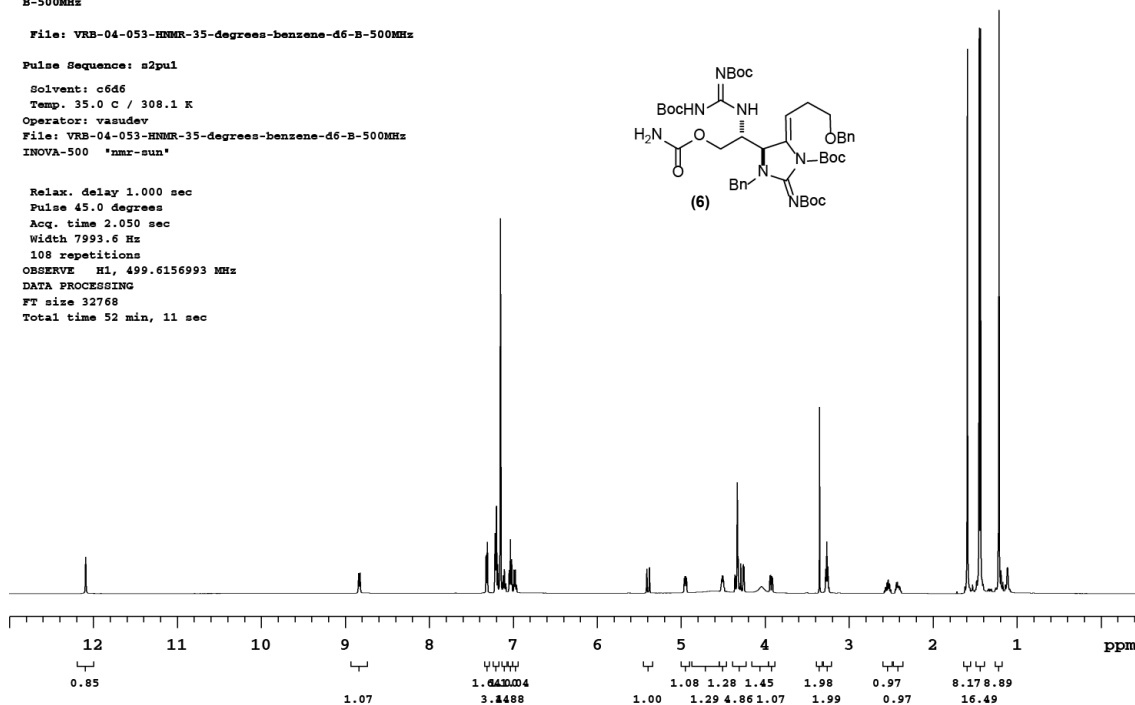

VRB-04-053-35-degrees-after cooling  
HNMR-benzene-d6  
B-500MHz

File: VRB-04-053-C13NMR-35-degrees-benzene-d6-B-500MHz

Pulse Sequence: s2pul

Solvent: c6d6  
Temp. 35.0 C / 308.1 K  
Operator: vasudev  
File: VRB-04-053-C13NMR-35-degrees-benzene-d6-B-500MHz  
INOVA-500 'nmr-sun'

Relax. delay 1.000 sec  
Pulse 45.0 degrees  
Acq. time 1.043 sec  
Width 31409.5 Hz  
35286 repetitions  
OBSERVE C13, 125.6284249 MHz  
DECOUPLE H1, 499.6182109 MHz  
Power 38 dB  
continuously on  
WALTZ-16 modulated  
DATA PROCESSING  
Line broadening 0.5 Hz  
FT size 65536  
Total time 57 hr, 24 sec

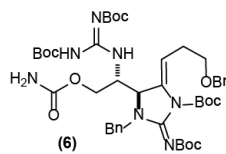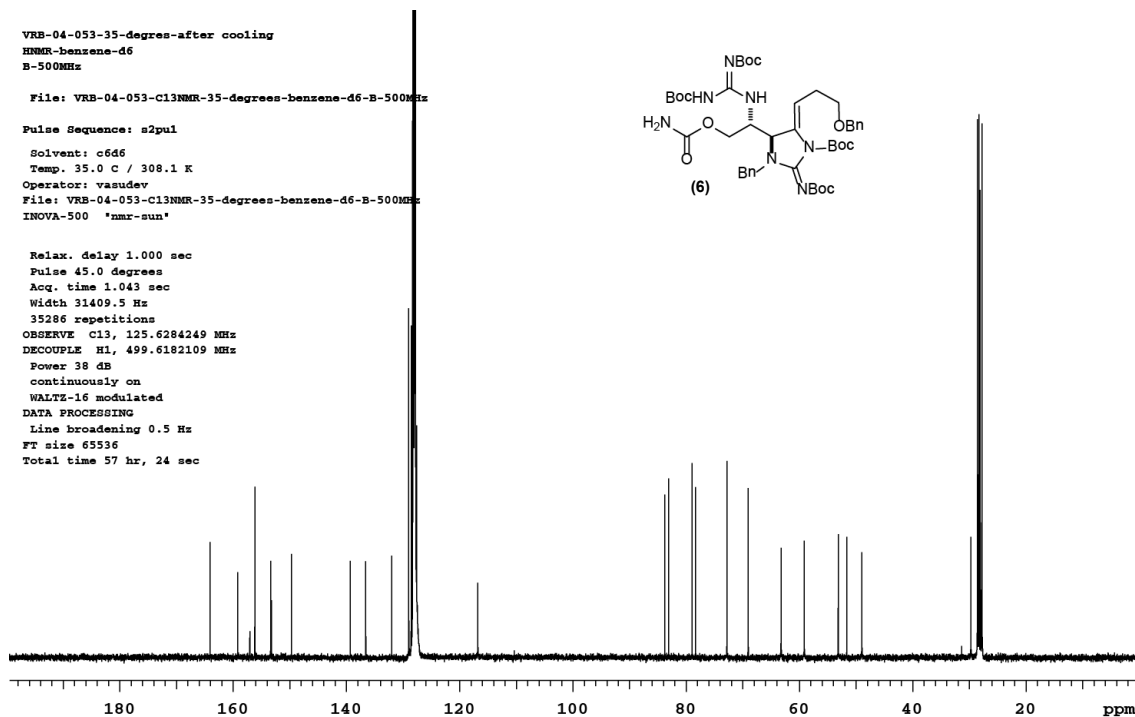

VRB-04-076-HNMR  
H-NMR-benzene-d6  
B-500MHz

File: VRB-04-076-HNMR-benzene-d6-RT-B-500MHz

Pulse Sequence: s2pul

Solvent: c6d6  
Temp. 25.0 C / 298.1 K  
Operator: vasudev  
File: VRB-04-076-HNMR-benzene-d6-RT-B-500MHz  
INOVA-500 'nmr-sun'

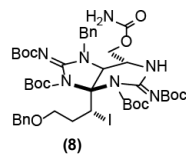

Relax. delay 1.000 sec  
Pulse 45.0 degrees  
Acq. time 2.050 sec  
Width 7993.6 Hz  
68 repetitions  
OBSERVE H1, 499.6156994 MHz  
DATA PROCESSING  
FT size 32768  
Total time 8 hr, 29 min, 44 sec

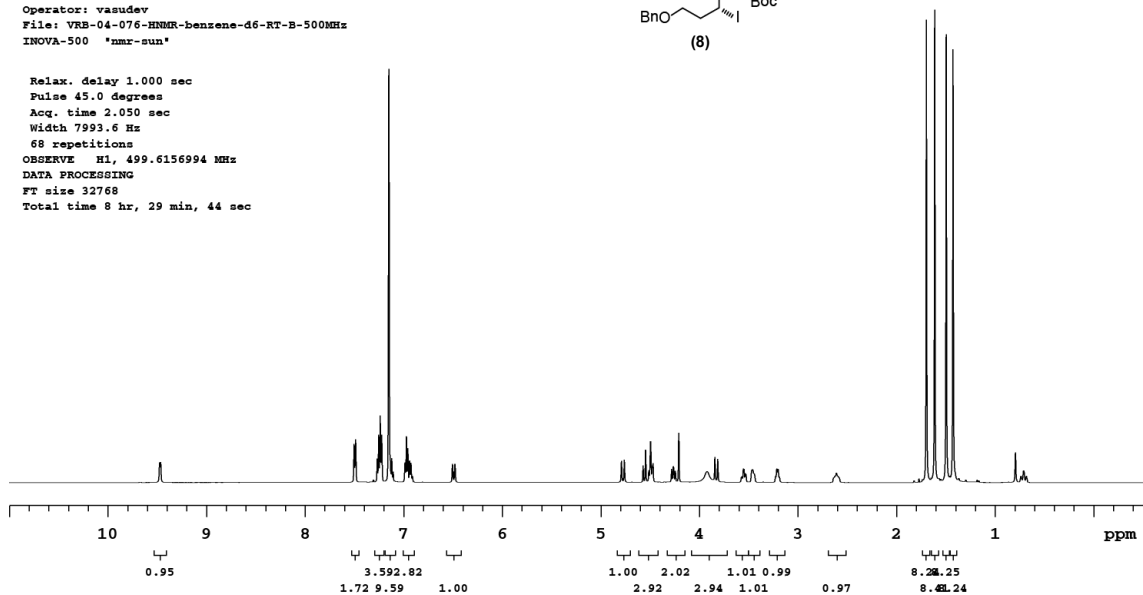

VRB-04-076RT  
C13NMR-benzene-d6  
B-500MHz

File: VRB-04-076-C13NMR-benzene-d6-RT-B-500MHz

Pulse Sequence: s2pul

Solvent: c6d6  
Temp. 25.0 C / 298.1 K  
Operator: vasudev  
File: VRB-04-076-C13NMR-benzene-d6-RT-B-500MHz  
INOVA-500 'nmr-sun'

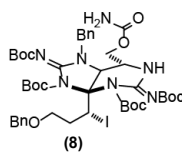

Relax. delay 1.000 sec  
Pulse 45.0 degrees  
Acq. time 1.043 sec  
Width 31409.5 Hz  
9738 repetitions  
OBSERVE C13, 125.6284287 MHz  
DECOUPLE H1, 499.6182109 MHz  
Power 38 dB  
continuously on  
WALTZ-16 modulated  
DATA PROCESSING  
Line broadening 0.5 Hz  
FT size 65536  
Total time 57 hr, 24 sec

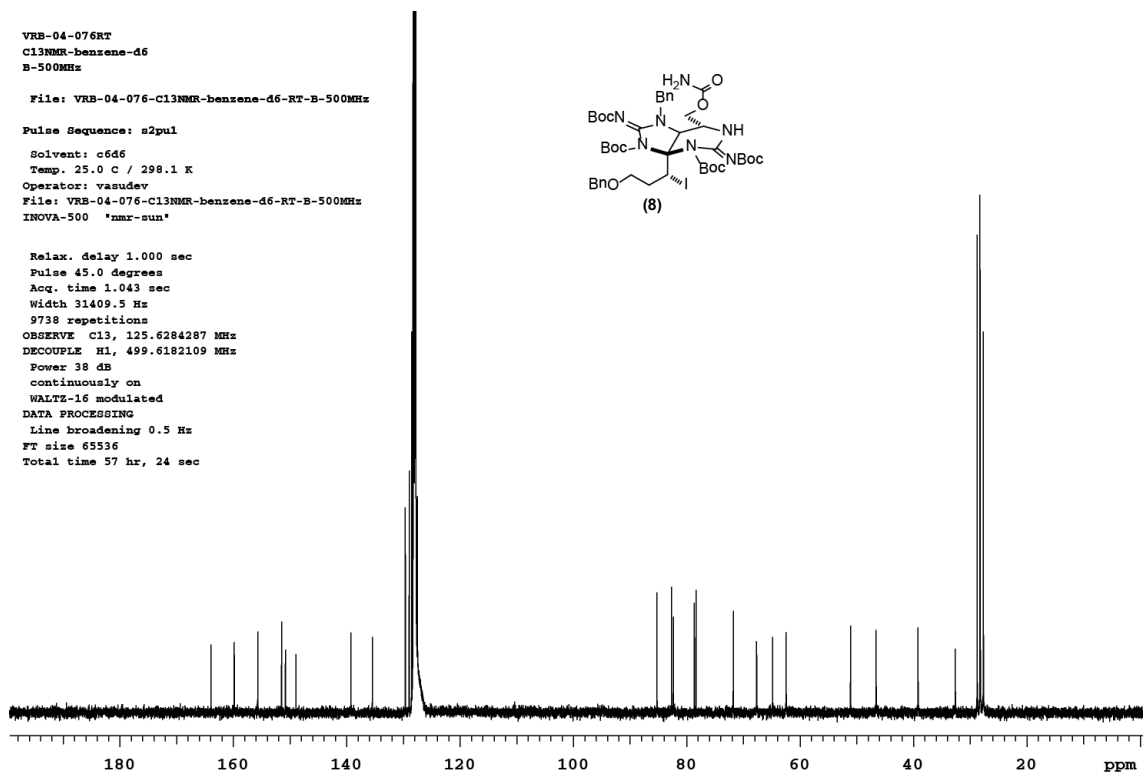

VRB-04-071-35-degrees  
H-NMR-benzene-d6  
B-500MHz

File: VRB-04-071-HNMR-35-degrees-benzene-d6-B-500MHz

Pulse Sequence: s2pul

Solvent: c6d6  
Temp. 35.0 C / 308.1 K  
Operator: vasudev  
File: VRB-04-071-HNMR-35-degrees-benzene-d6-B-500MHz  
INOVA-500 \*nmr-sun\*

Relax. delay 1.000 sec  
Pulse 45.0 degrees  
Acq. time 2.050 sec  
Width 7993.6 Hz  
154 repetitions  
OBSERVE H1, 499.6156993 MHz  
DATA PROCESSING  
FT size 32768  
Total time 8 hr, 29 min, 44 sec

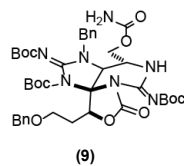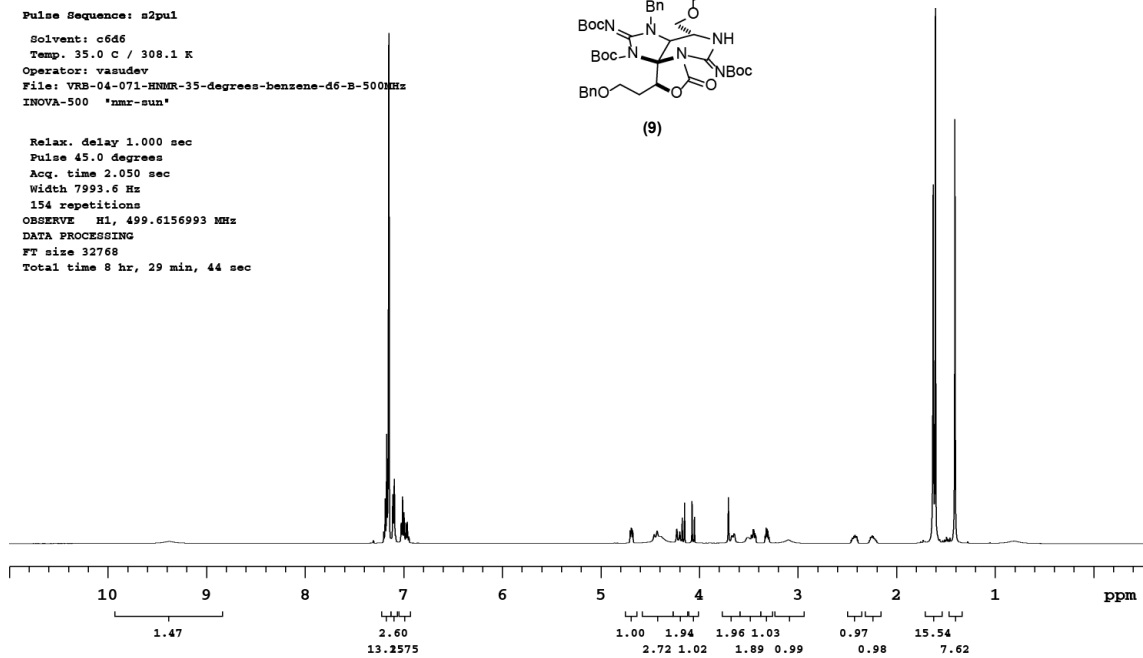

VRB-04-071-35-degrees  
C13-NMR-benzene-d6  
B-500MHz

File: VRB-04-071-C13-NMR-55-degrees-benzene-d6-B-500MHz

Pulse Sequence: s2pul

Solvent: c6d6  
Temp. 35.0 C / 308.1 K  
Operator: vasudev  
File: VRB-04-071-C13-NMR-55-degrees-benzene-d6-B-500MHz  
INOVA-500 \*nmr-sun\*

Relax. delay 1.000 sec  
Pulse 45.0 degrees  
Acq. time 1.043 sec  
Width 31409.5 Hz  
33126 repetitions  
OBSERVE C13, 125.6284249 MHz  
DECOUPLE H1, 499.6182109 MHz  
Power 38 dB  
continuously on  
WALTZ-16 modulated  
DATA PROCESSING  
Line broadening 0.5 Hz  
FT size 65536  
Total time 570 hr, 4 min, 3 sec

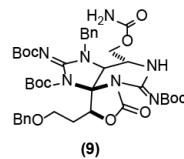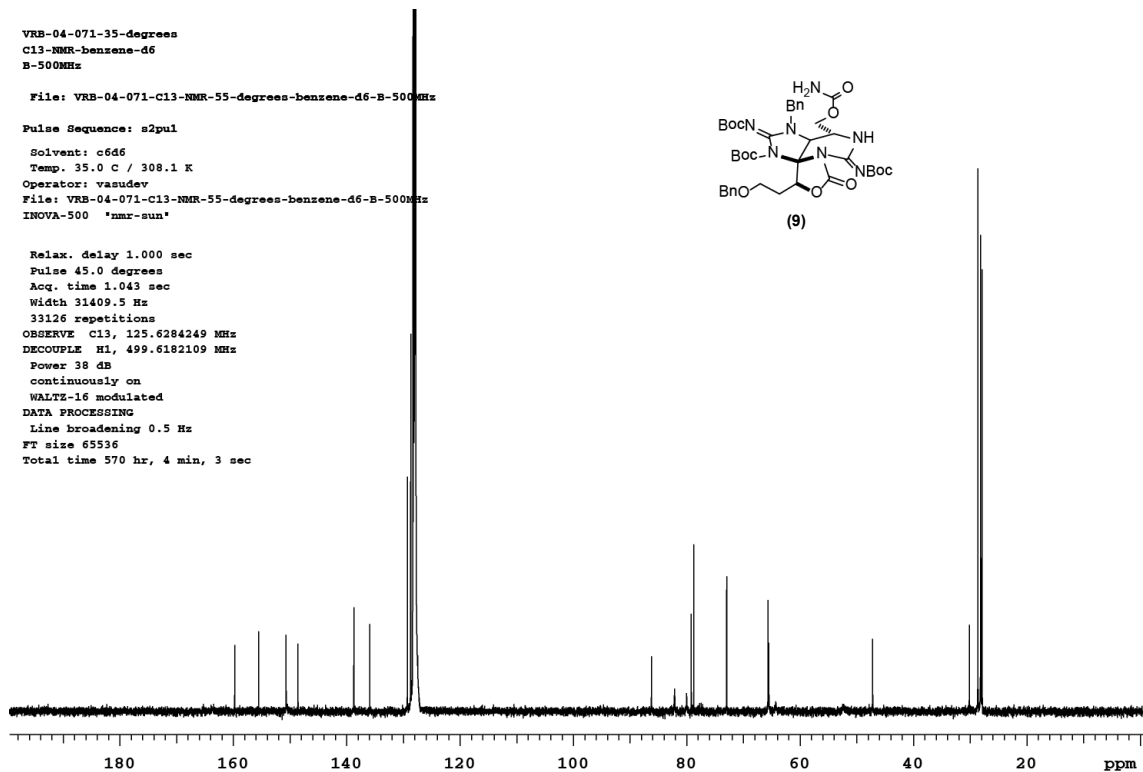





VRB-04-145-RT  
HNMR-CDC13  
500MHz

File: VRB-04-145-HNMR-CDC13-RT-B-500MHz

Pulse Sequence: s2pul

Solvent: cdc13  
Temp. 25.0 C / 298.1 K  
Operator: vasudev  
File: VRB-04-145-HNMR-CDC13-RT-B-500MHz  
INOVA-500 'nmr-sun'

Relax. delay 1.000 sec  
Pulse 45.0 degrees  
Acq. time 2.050 sec  
Width 7993.6 Hz  
50 repetitions  
OBSERVE H1, 499.6156662 MHz  
DATA PROCESSING  
FT size 32768  
Total time 8 hr, 29 min, 44 sec

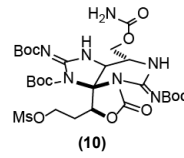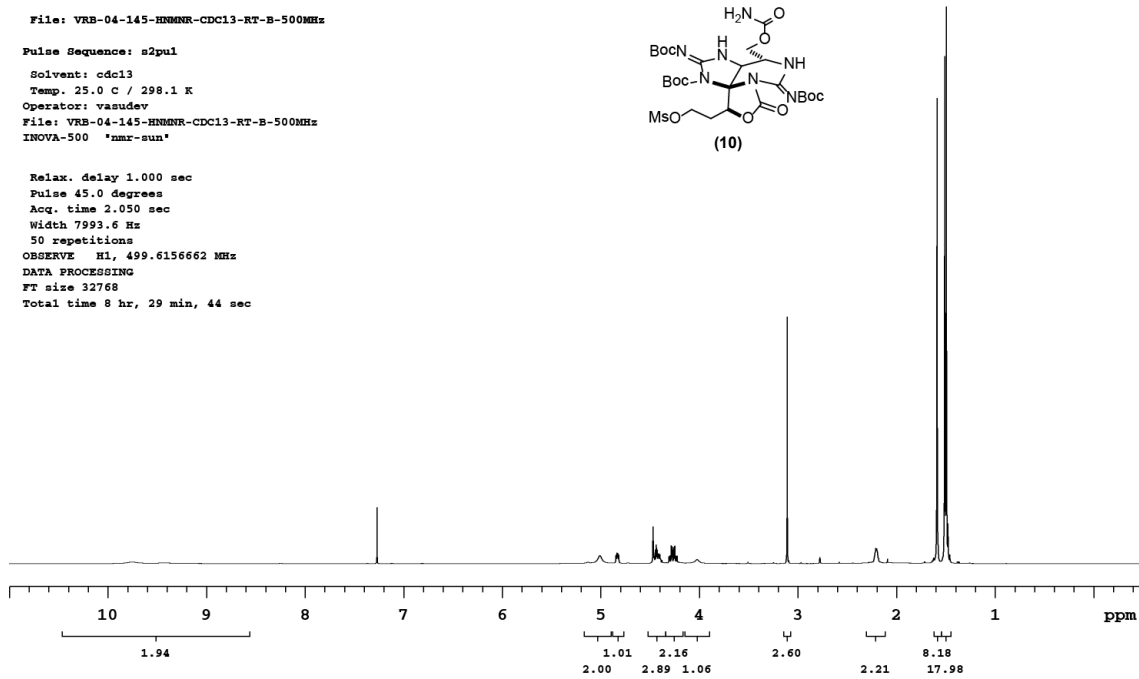

VRB-04-mesylate  
C13-NMR-CDC13  
B-500MHz

Archive directory: /home/nmr/vasudev/vnmrsoys/data  
Sample directory: VRB-04-053\_20110720\_01  
File: VRB-04-mesylate-C13NMR-CDC13-500MHz-B-500MHz-pure-RT

Pulse Sequence: s2pul

Solvent: cdc13  
Temp. 26.0 C / 299.1 K  
Operator: vasudev  
File: VRB-04-mesylate-C13NMR-CDC13-500MHz-B-500MHz-pure-RT  
INOVA-500 'nmr-sun'

Relax. delay 1.000 sec  
Pulse 45.0 degrees  
Acq. time 1.043 sec  
Width 31409.5 Hz  
4484 repetitions  
OBSERVE C13, 125.6284413 MHz  
DECOUPLE H1, 499.6181660 MHz  
Power 38 dB  
continuously on  
WALTZ-16 modulated  
DATA PROCESSING  
Line broadening 0.5 Hz  
FT size 65536  
Total time 570 hr, 4 min, 2 sec

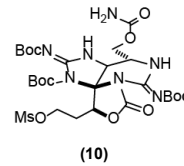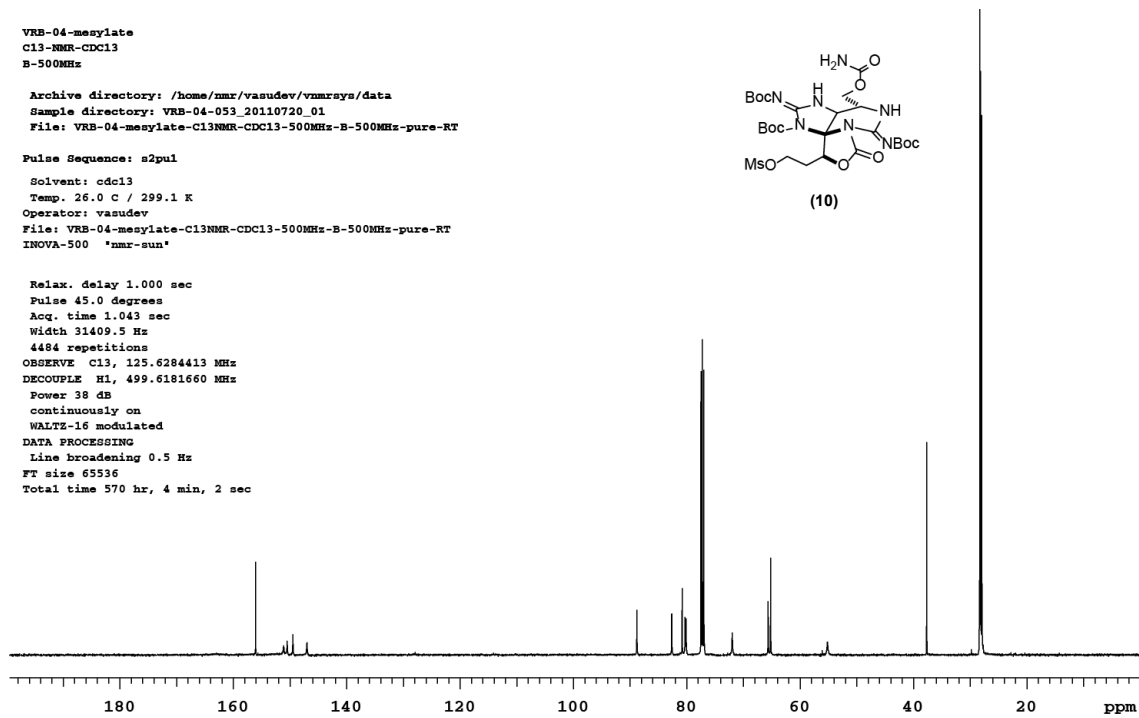

VRB-04-154-B-RT  
HNMR-CDCl3  
500MHz

File: VRB-04-154-HNMR-CDCl3-500B-rt

Pulse Sequence: s2pul

Solvent: cdcl3  
Temp. 26.0 C / 299.1 K  
Operator: vasudev

File: VRB-04-154-HNMR-CDCl3-500B-rt  
INOVA-500 'nmr-sun'

Relax. delay 1.000 sec  
Pulse 45.0 degrees  
Acq. time 2.050 sec  
Width 7993.6 Hz  
54 repetitions  
OBSERVE H1, 499.6156662 MHz  
DATA PROCESSING  
FT size 32768  
Total time 84 hr, 57 min, 26 sec

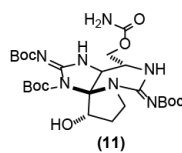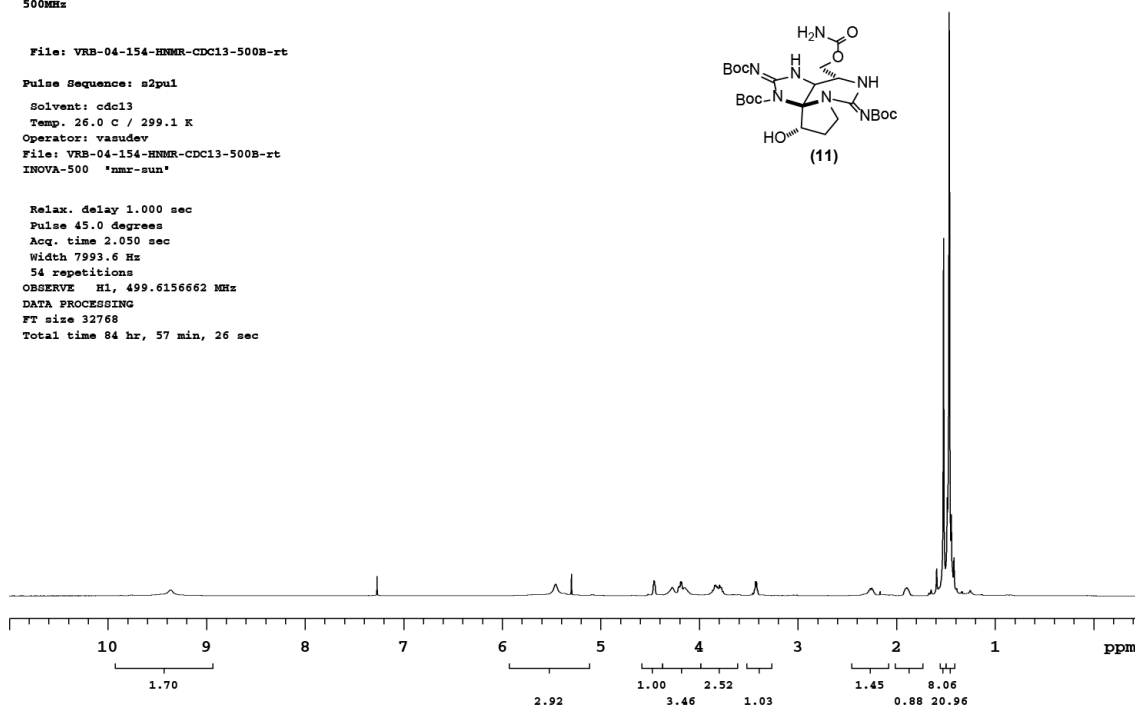

VRB-040-154//Cl3-NMR-CDCl3//500MHz

Pulse Sequence: s2pul

Solvent: CDCl3  
Temp. 25.0 C / 298.1 K  
User: 1-14-87  
File: VRB-04-154-Cl3-NMR-CDCl3-500MHz

INOVA-500 'nmr-sun'

Relax. delay 1.000 sec  
Pulse 83.1 degrees  
Acq. time 1.300 sec  
Width 25000.0 Hz  
24156 repetitions  
OBSERVE C13, 125.6782298 MHz  
DECOUPLE H1, 499.8161988 MHz  
Power 44 dB  
continuously on  
WALTZ-16 modulated  
DATA PROCESSING  
Line broadening 0.5 Hz  
FT size 65536  
Total time 641 hr, 29 min, 46 sec

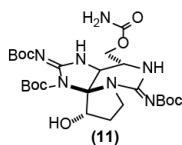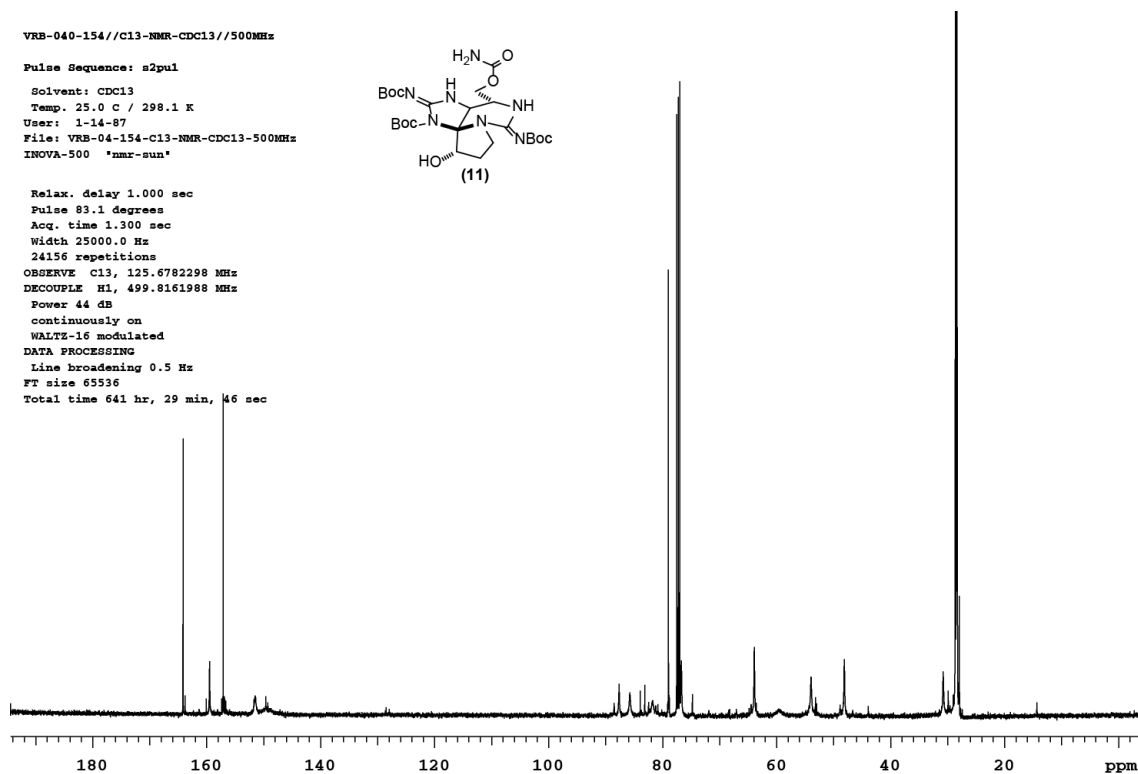

VRB-04-159-crude  
HNMR-benzene-d6  
500MHz

Pulse Sequence: s2pu1

Solvent: Benzene  
Temp. 25.0 C / 298.1 K

File: VRB-04-159-30mg-scale-up-HNMR-benzene-d6-500MHz  
INOVA-500 'nmr-sun'

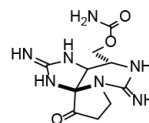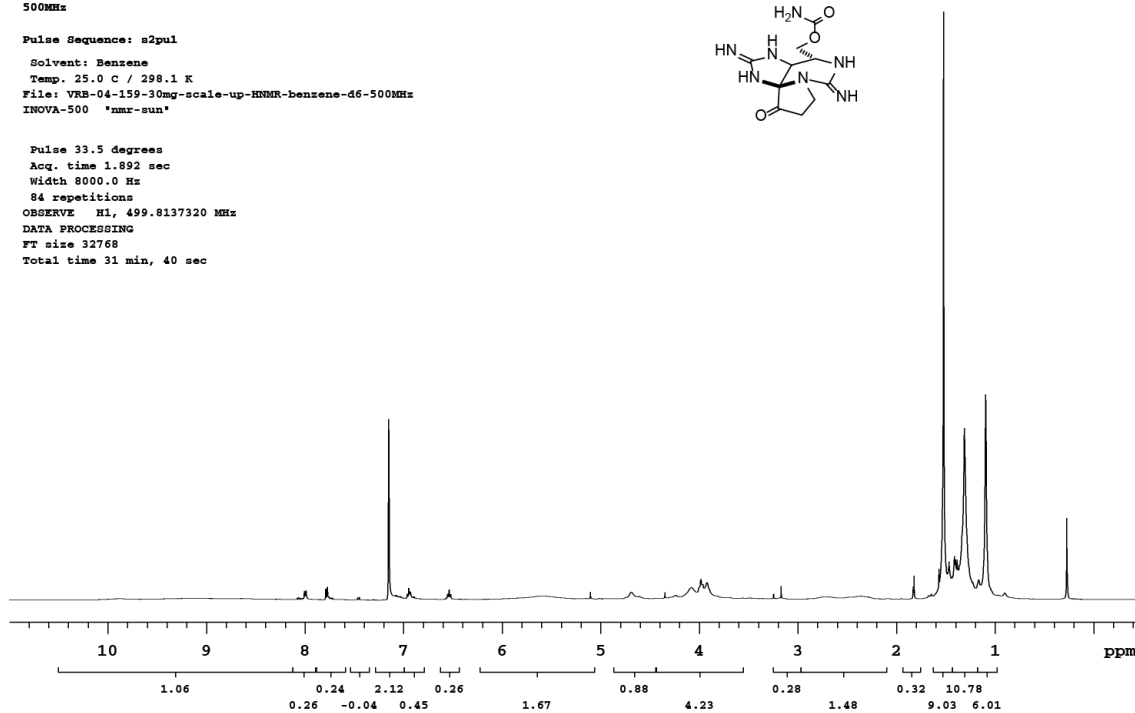

(+)-saxitoxinol  
HNMR-D2O  
500MHz  
Pulse Sequence: s2pul

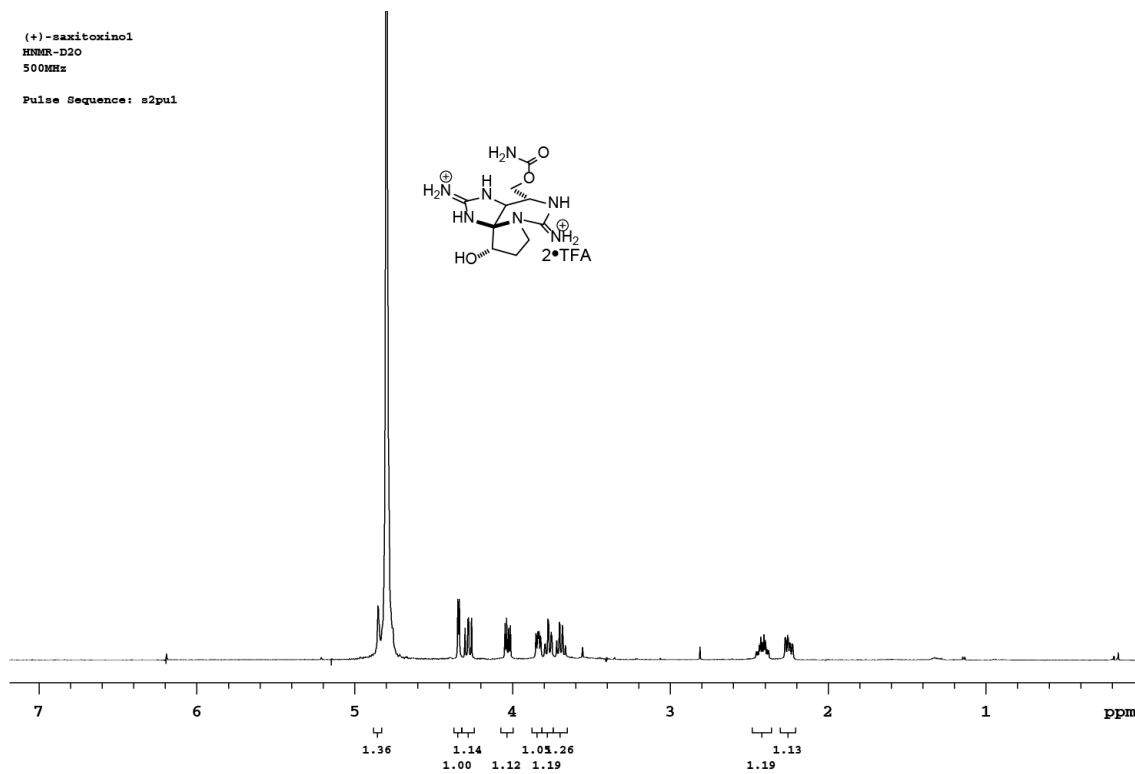

(+)-saxitoxinol  
C13-NMR-D2O  
500MHz  
Pulse Sequence: s2pul

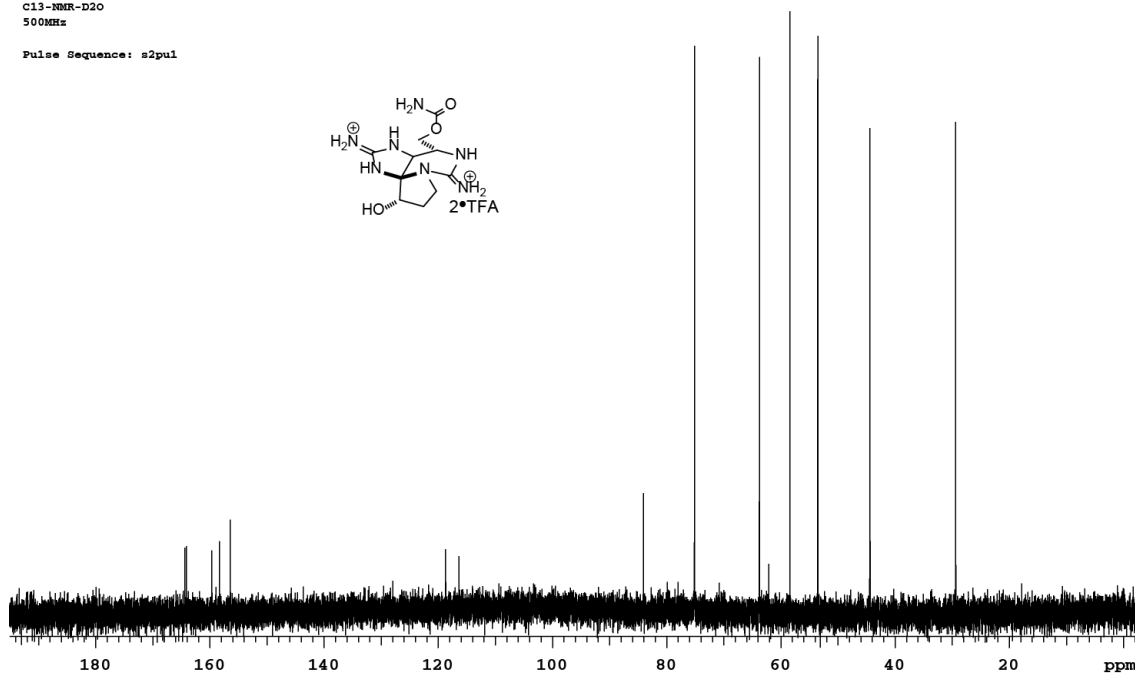

(+)-saxitoxin  
1H-NMR-D2O  
500MHz  
Pulse Sequence: s2pul

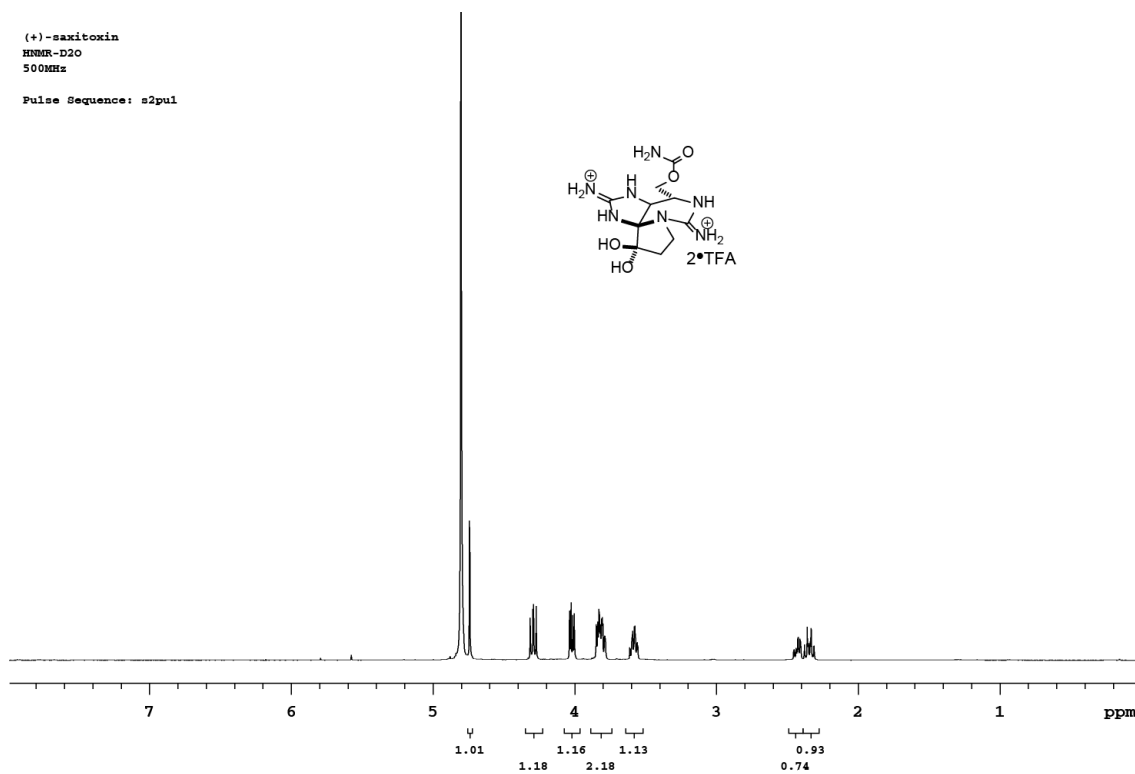

(+)-saxitoxin  
13C-NMR-D2O  
500MHz  
Pulse Sequence: s2pul

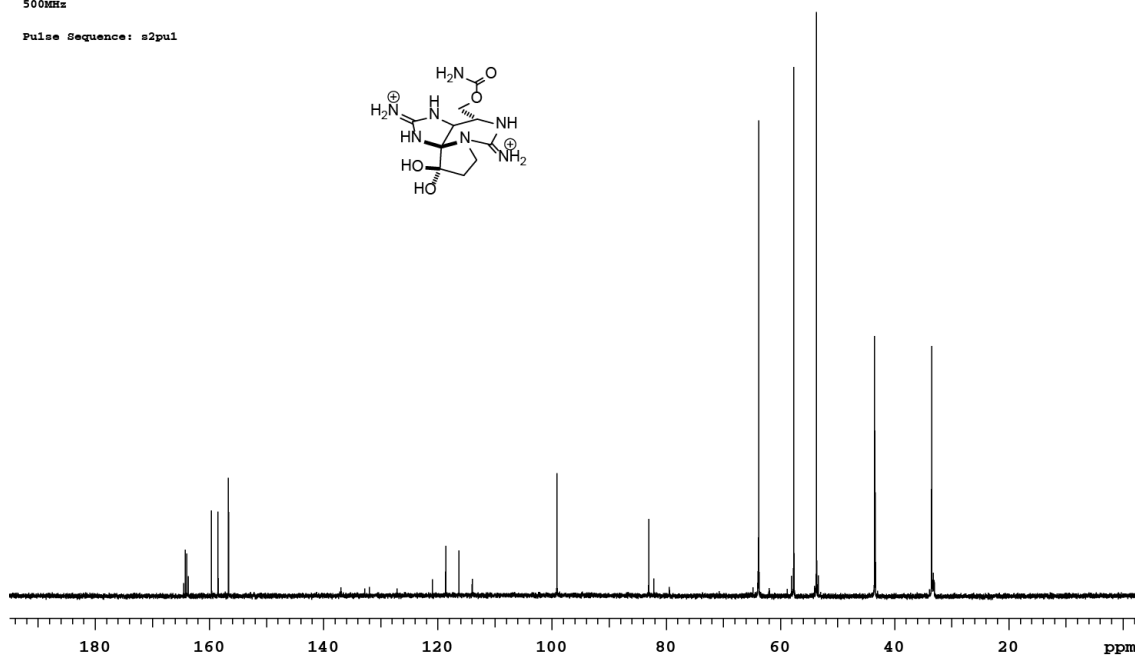

VRB-04-172  
 1H-NMR-benzene-d6  
 500MHz  
 Pulse Sequence: s2pul  
 Solvent: Benzene  
 Temp: 25.0 C / 298.1 K  
 File: VRB-04-172-1H-NMR-benzene-d6-500MHz  
 INOVA-500 'nmr-sun'

Pulse 33.5 degrees  
 Acq. time 1.892 sec  
 Width 8000.0 Hz  
 128 repetitions  
 OBSERVE H1, 499.8137320 MHz  
 DATA PROCESSING  
 FT size 32768  
 Total time 31 min, 40 sec

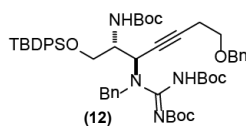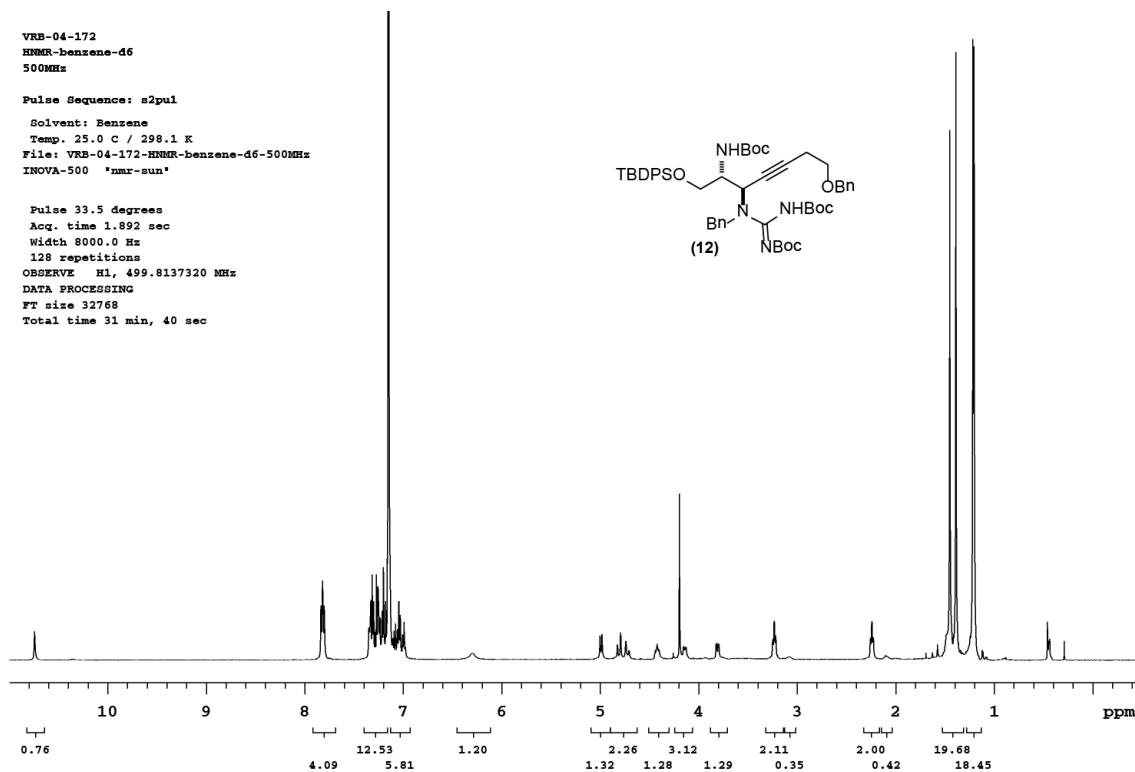

VRB-04-172  
 13C-NMR-benzene-d6  
 300MHz  
 Pulse Sequence: s2pul  
 Solvent: Benzene  
 Ambient temperature  
 File: VRB-04-172-13C-NMR-benzene-d6-300MHz  
 INOVA-500 'nmr-sun'

Relax. delay 1.000 sec  
 Pulse 41.7 degrees  
 Acq. time 1.815 sec  
 Width 16501.7 Hz  
 25712 repetitions  
 OBSERVE C13, 75.4544383 MHz  
 DECOUPLE H1, 300.0782426 MHz  
 Power 37 dB  
 continuously on  
 WALTZ-16 modulated  
 DATA PROCESSING  
 Line broadening 1.0 Hz  
 FT size 65536  
 Total time 7844 hr, 16 min, 2 sec

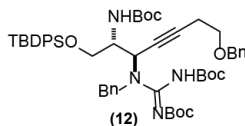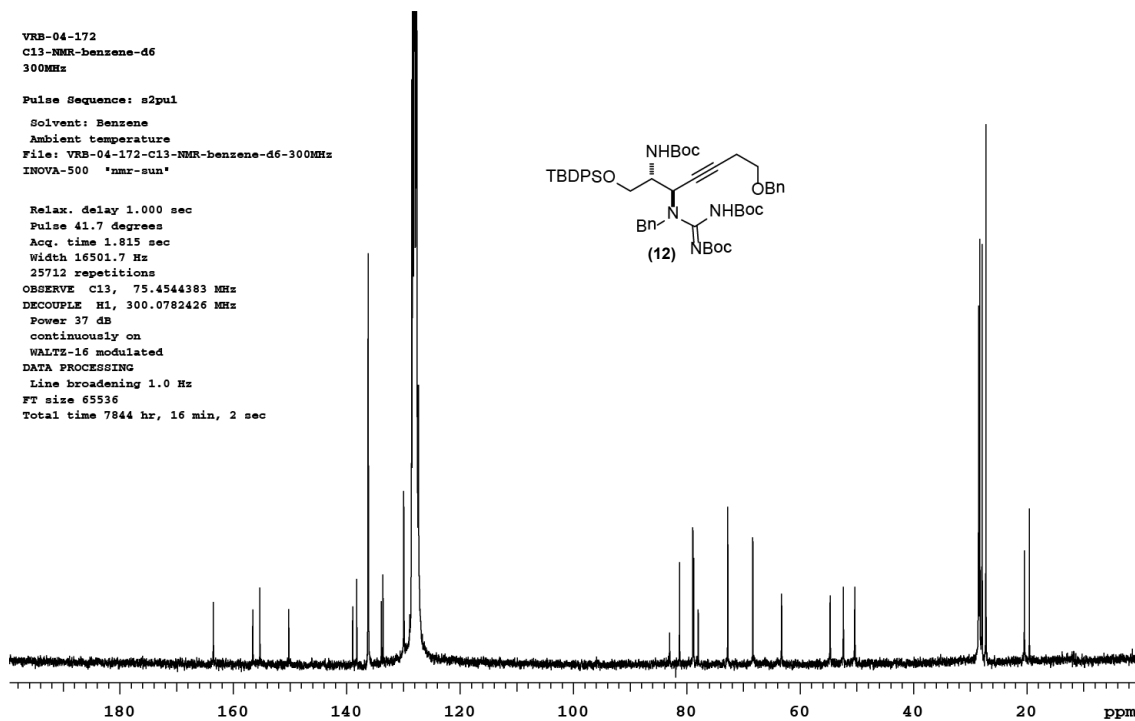

#### 4. Aligned <sup>1</sup>H NMR spectrum of model ene-guanidine (17) with the ene-guanidine (7)

VRB-04-173-crude  
 HNMR-benzene-d6  
 500MHz

Pulse Sequence: s2pul  
 Solvent: Benzene  
 Temp. 25.0 C / 298.1 K  
 File: VRB-04-173-HNMR-benzene-d6-500MHz-RT  
 INOVA-500 \*nmr-sun\*

Pulse 33.5 degrees  
 Acq. time 1.892 sec  
 Width 8000.0 Hz  
 112 repetitions  
 OBSERVE H1, 499.8137320 MHz  
 DATA PROCESSING  
 FT size 32768  
 Total time 31 min, 40 sec

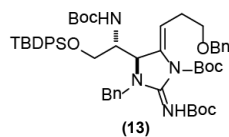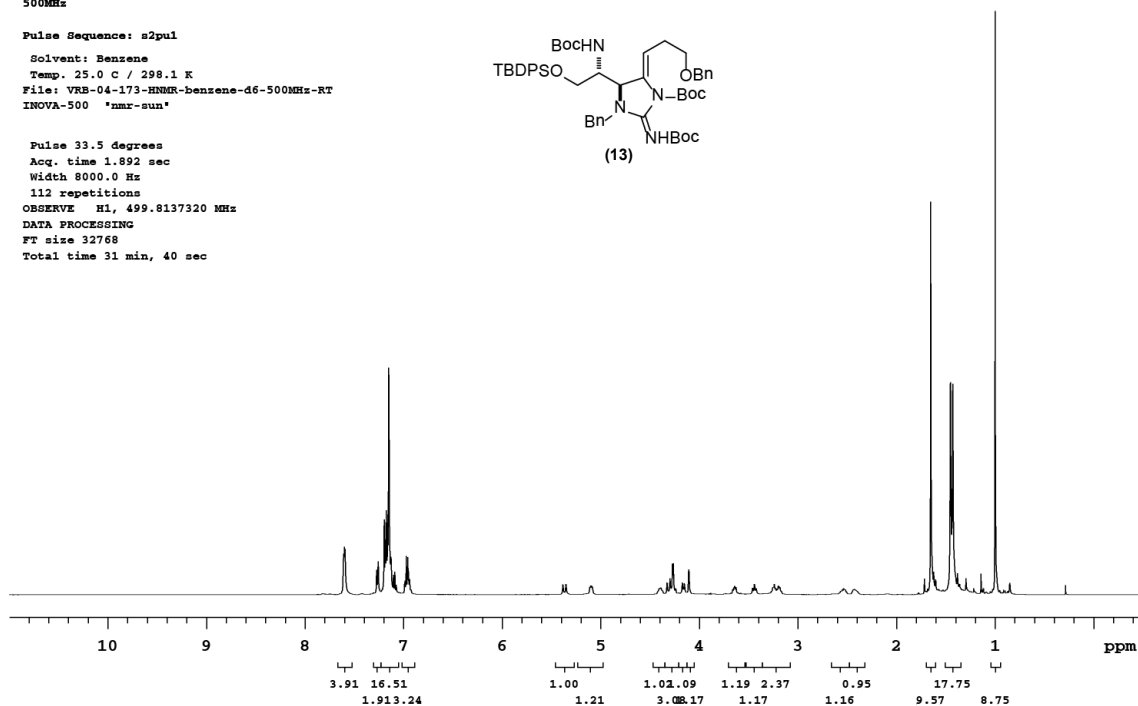

VRB-04-053-35-degrees  
 HNMR-benzene-d6  
 B-500MHz

File: VRB-04-053-HNMR-35-degrees-benzene-d6-B-500MHz

Pulse Sequence: s2pul  
 Solvent: c6d6  
 Temp. 35.0 C / 308.1 K  
 Operator: vasudev  
 File: VRB-04-053-HNMR-35-degrees-benzene-d6-B-500MHz  
 INOVA-500 \*nmr-sun\*

Relax. delay 1.000 sec  
 Pulse 45.0 degrees  
 Acq. time 2.050 sec  
 Width 7993.6 Hz  
 108 repetitions  
 OBSERVE H1, 499.6156993 MHz  
 DATA PROCESSING  
 FT size 32768  
 Total time 52 min, 11 sec

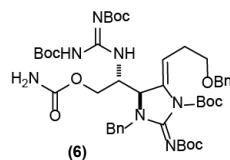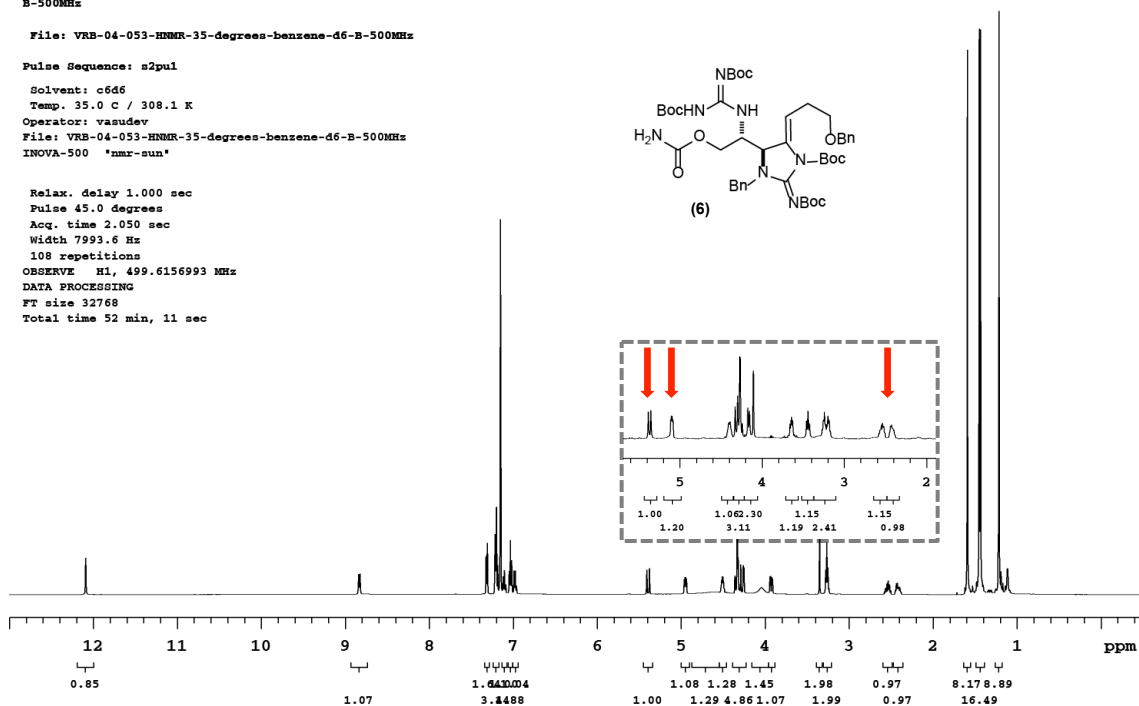

VRB-04-173-crude  
HNMR-benzene-d6  
500MHz  
Pulse Sequence: s2pul  
Solvent: Benzene  
Temp: 25.0 C / 298.1 K  
User: 1-14-87  
File: VRB-04-174-C13-NMR-benzene-d6-crude-500MHz  
INOVA-500 \*nmr-sun\*

Relax. delay 1.000 sec  
Pulse 83.1 degrees  
Acq. time 1.300 sec  
Width 25000.0 Hz  
3214 repetitions  
OBSERVE C13, 125.6782243 MHz  
DECOUPLE H1, 499.8162438 MHz  
Power 44 dB  
continuously on  
WALTZ-16 modulated  
DATA PROCESSING  
Line broadening 0.5 Hz  
FT size 65536  
Total time 641 hr, 29 min, 46 sec

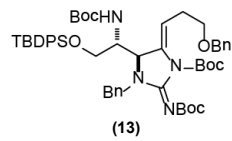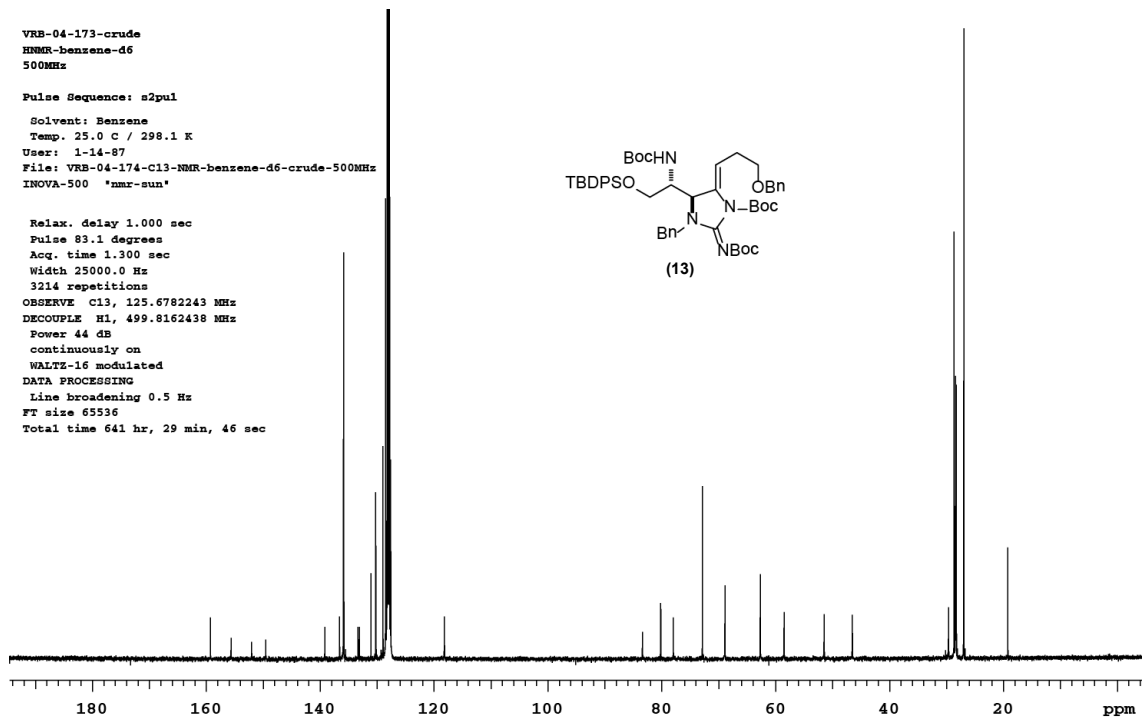



Spectral comparison ( $^1\text{H}$  NMR and  $^{13}\text{C}$  NMR data) of natural and synthetic  $\beta$ -saxitoxinol

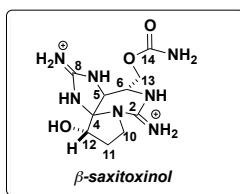

$^1\text{H}$  NMR and  $^{13}\text{C}$  NMR data of natural  $\beta$ -saxitoxinol<sup>1</sup>

| position | $^1\text{H}$ NMR<br>$\delta$ (ppm) | multiplicity | coupling constant<br>(Hz) | $^{13}\text{C}$ NMR<br>$\delta$ (ppm) |
|----------|------------------------------------|--------------|---------------------------|---------------------------------------|
| 2        | -                                  | -            | -                         | 156.4                                 |
| 4        | -                                  | -            | -                         | 80.7                                  |
| 5        | 4.33                               | s            | -                         | 58.4                                  |
| 6        | 3.57                               | m            | -                         | 53.6                                  |
| 8        | -                                  | -            | -                         | 158.9                                 |
| 10       | 3.35                               | m            | -                         | 28.2*                                 |
| 11       | 2.02<br>2.00                       | m<br>m       | -<br>-                    | 27.7                                  |
| 12       | 3.79                               | d            | 4.6                       | 75.2                                  |
| 13       | 3.86<br>3.68                       | dd<br>dd     | 12.0, 9.6<br>12.0, 5.6    | 63.8                                  |
| 14       | -                                  | -            | -                         | 159.3                                 |

$^1\text{H}$  NMR and  $^{13}\text{C}$  NMR data of synthetic  $\beta$ -saxitoxinol

| position | $^1\text{H}$ NMR<br>$\delta$ (ppm) | multiplicity | coupling constant<br>(Hz)             | $^{13}\text{C}$ NMR<br>$\delta$ (ppm) |
|----------|------------------------------------|--------------|---------------------------------------|---------------------------------------|
| 2        | -                                  | -            | -                                     | 156.4                                 |
| 4        | -                                  | -            | -                                     | 84.0                                  |
| 5        | 4.53                               | brs          | -                                     | 58.3                                  |
| 6        | 3.53                               | ddd          | 9.2, 5.3, 1.7                         | 53.5                                  |
| 8        | -                                  | -            | -                                     | 158.3                                 |
| 10       | 3.47<br>3.38                       | ddd<br>ddd   | 10.2, 8.3, 1.9<br>9.0, 9.0, 8.7       | 44.3                                  |
| 11       | 2.10<br>1.93                       | ddd<br>ddd   | 14.1, 9.7, 9.7, 3.9<br>14.1, 7.3, 1.2 | 29.3                                  |
| 12       | 4.03                               | d            | 4.4                                   | 75.1                                  |
| 13       | 3.93<br>3.72                       | dd<br>dd     | 11.7, 9.2<br>11.7, 5.3                | 63.7                                  |
| 14       | -                                  | -            | -                                     | 159.6                                 |

1. Koehn E. F.; Ghazarossian, E. V.; Schantz, E. J. Schnoes, H. K.; Strong F. M. *Biorganic chemistry*, **1981**, *10*, 412- 428.

\* The  $^{13}\text{C}$  NMR chemical shift value of C11 (28.2 ppm) in the natural sample appears to be incorrectly labelled. We observe this chemical shift at 44.3 ppm consistent with those reported by Du Bois and Nagasawa.<sup>2</sup>

2. (a) Fleming, J. J.; Du Bois, J. *J. Am. Chem. Soc.* **2006**, *128*, 3926– 3927.

(b) Fleming, J. J.; McReynolds, M. D.; Du Bois, J. *J. Am. Chem. Soc.* **2007**, *129*, 9964–9975.

(c) Iwamoto, O.; Shinohara, R.; Nagasawa, K. *Chem. Asian. J.* **2009**, *4*, 277- 285.

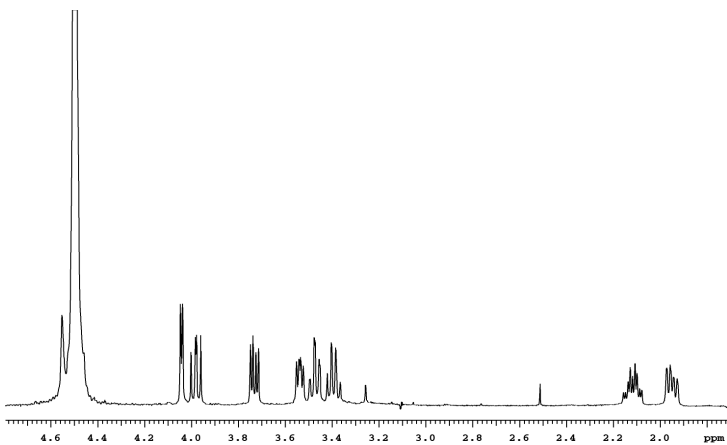

$^1\text{H}$  NMR of Synthetic  $\beta$ -saxitoxinol  
( $\text{D}_2\text{O}$  referenced at 4.50 ppm @ 500MHz)

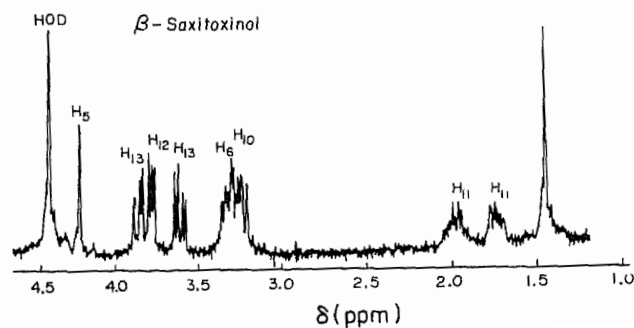

$^1\text{H}$  NMR of Natural  $\beta$ -saxitoxinol  
( $\text{D}_2\text{O}$  referenced at 4.50 ppm @ 200 MHz)<sup>1</sup>

Spectral comparison (<sup>1</sup>H NMR and <sup>13</sup>C NMR data) of natural and synthetic (+)-saxitoxin

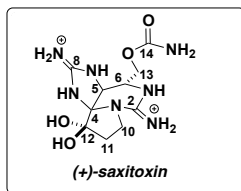

<sup>1</sup>H NMR and <sup>13</sup>C NMR data of natural (+)-saxitoxin<sup>1</sup>

| position | <sup>1</sup> H NMR<br>δ (ppm) | multiplicity | coupling constant<br>(Hz)    | <sup>13</sup> C NMR<br>δ (ppm) |
|----------|-------------------------------|--------------|------------------------------|--------------------------------|
| 2        | -                             | -            | -                            | 156.8                          |
| 4        | -                             | -            | -                            | 83.2                           |
| 5        | 4.33                          | d            | 1.2                          | 57.8                           |
| 6        | 3.47                          | ddd          | 9.0, 6.0, 1.2                | 53.8                           |
| 8        | -                             | -            | -                            | 158.5                          |
| 10       | 3.40<br>3.18                  | dd<br>ddd    | 10.0, 3.0<br>11.0, 10.0, 8.0 | 33.8                           |
| 11       | 2.00<br>1.99                  | m<br>m       | -<br>-                       | 43.8                           |
| 12       | -                             | -            | -                            | 99.4                           |
| 13       | 3.88<br>3.65                  | dd<br>dd     | 12.0, 9.0<br>12.0, 6.0       | 64.0                           |
| 14       | -                             | -            | -                            | 159.7                          |

<sup>1</sup>H NMR and <sup>13</sup>C NMR data of synthetic (+)-saxitoxin

| position | <sup>1</sup> H NMR<br>δ (ppm) | multiplicity | coupling constant<br>(Hz)        | <sup>13</sup> C NMR<br>δ (ppm) |
|----------|-------------------------------|--------------|----------------------------------|--------------------------------|
| 2        | -                             | -            | -                                | 156.6                          |
| 4        | -                             | -            | -                                | 83.0                           |
| 5        | 4.42                          | d            | 0.9                              | 57.6                           |
| 6        | 3.50                          | ddd          | 9.2, 5.3, 0.9                    | 53.6                           |
| 8        | -                             | -            | -                                | 158.4                          |
| 10       | 3.47<br>3.20-3.23             | ddd<br>m     | 10.2, 8.3, 1.9<br>-              | 33.5                           |
| 11       | 2.10<br>2.02                  | ddd<br>ddd   | 14.1, 8.3, 1.9<br>14.1, 9.7, 9.7 | 43.4                           |
| 12       | -                             | -            | -                                | 99.1                           |
| 13       | 3.96<br>3.69                  | dd<br>dd     | 11.2, 9.2<br>12.7, 5.3           | 63.7                           |
| 14       | -                             | -            | -                                | 159.6                          |

1. Koehn E. F.; Ghazarossian, E. V.; Schantz, E. J. Schnoes, H. K.; Strong F. M. *Biorganic chemistry*, **1981**, *10*, 412- 428.

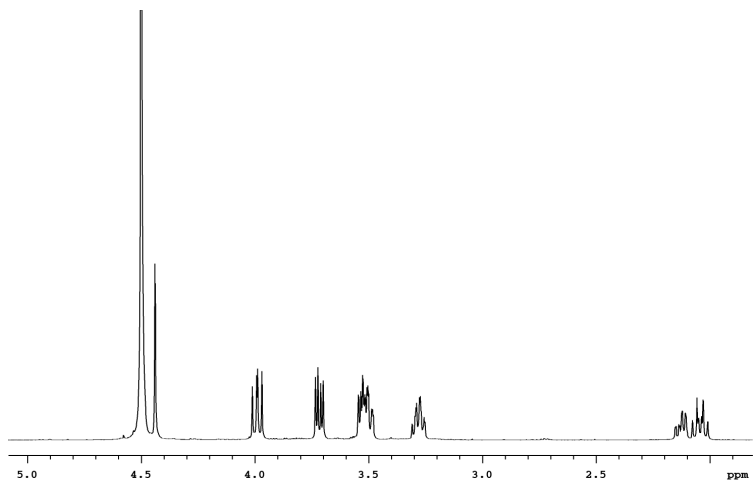

<sup>1</sup>H NMR spectrum of synthetic (+)-saxitoxin (D<sub>2</sub>O referenced at 4.50ppm @ 500 MHz)

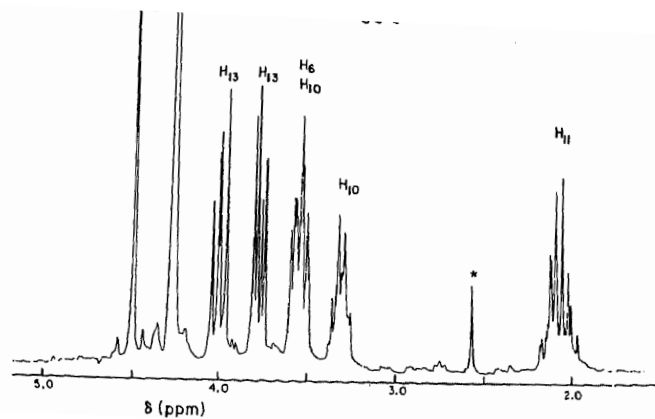

<sup>1</sup>H NMR spectrum of natural (+)-saxitoxin (D<sub>2</sub>O referenced at 4.50ppm @ 200 MHz)<sup>1</sup>
